# Supplementary material for: Formamidine hydrochloride as an amino surrogate: I2-catalyzed oxidative amidation of aryl methyl ketones leading to free (N–H) α-ketoamides
Source: Royal Society of Chemistry journal article supplement (doi:10.1039/c4ob02591a), 2015-01-01

## *Supporting Information*

### **Formamidine hydrochloride as an amino surrogate: I<sub>2</sub>-catalyzed oxidative amidation of aryl methyl ketones leading to free (N-H) $\alpha$ -ketoamides**

*Shan Liu, Qinghe Gao, Xia Wu, Jingjing Zhang, Kerong Ding and Anxin Wu\**

*Key Laboratory of Pesticide & Chemical Biology, Ministry of Education; College of Chemistry, Central China Normal University, 152 Luoyu Road, Wuhan, Hubei, 430079, People's Republic of China*

*E-mail: chwuax@mail.ccnu.edu.cn*

#### Table of Contents

|                                                                        |         |
|------------------------------------------------------------------------|---------|
| 1. General Information.....                                            | S2      |
| 2. General Procedures for the Synthesis of <b>3</b> .....              | S2      |
| 3. General Procedures for the Synthesis of <b>1s</b> , <b>1t</b> ..... | S2-S4   |
| 4. Characterization Data of Compounds.....                             | S5-S10  |
| 5. <sup>1</sup> H and <sup>13</sup> C NMR Spectra of Compounds.....    | S11-S33 |

## 1. General Information

All substrates and reagents were commercially available and used without further purification. TLC analysis was performed using pre-coated glass plates. Column chromatography was performed using silica gel (200-300 mesh). IR spectra were recorded on a Perkin-Elmer PE-983 infrared spectrometer as KBr pellets with absorption in  $\text{cm}^{-1}$ .  $^1\text{H}$  spectra were recorded in  $\text{CDCl}_3$  or  $\text{DMSO}-d_6$  on 400/600 MHz NMR spectrometers and resonances ( $\delta$ ) are given in parts per million relative to tetramethylsilane. Data are reported as follows: chemical shift, multiplicity (s = singlet, d = doublet, t = triplet, m = multiplet), coupling constants (Hz) and integration.  $^{13}\text{C}$  spectra were recorded in  $\text{CDCl}_3$  or  $\text{DMSO}-d_6$  on 100/150 MHz NMR spectrometers and resonances ( $\delta$ ) are given in ppm. HRMS were obtained on a Bruker 7-tesla FT-ICR MS equipped with an electrospray source. Melting points were determined using XT-4 apparatus and not corrected.

## 2. General Procedures for the Synthesis of 3

A mixture of acetophenone **1a** (1.0 mmol), formamidine hydrochloride **2** (1.0 mmol), iodine (0.8 mmol) in DMSO (2 mL) was stirred at 110 °C for 11 h till almost completed conversion of the substrates by TLC analysis, and added 50 mL water to the mixture, then extracted with EtOAc three times ( $3 \times 50$  mL). The extract was washed with 10%  $\text{Na}_2\text{S}_2\text{O}_3$  solution (w/w), dried over anhydrous  $\text{Na}_2\text{SO}_4$  and concentrated in vacuo. The residue was purified by column chromatography on silica gel (eluent: petroleum ether/EtOAc = 5:1) to afford the desired product **3a** as a yellow solid (131.3 mg, 88% yield).

## 3. General Procedures for the Synthesis of 1s, 1t

A mixture of **1r** (3.0 mmol), KOH (15.0 mmol), in acetone (5 mL) with five drops of water was stirred in the ice-water bath for 0.5 h, then methyl iodide (45.0 mmol) or benzyl bromide (12.0 mmol) in acetone (2 mL) was dropped into the mixture within 30 min. Ten minutes later, the mixture was stirred at room temperature for 3 h till almost completed conversion of the substrates by TLC analysis, then removed the acetone in vacuo, and added 50 mL water to the mixture, extracted with EtOAc three times ( $3 \times 50$  mL), dried over anhydrous  $\text{Na}_2\text{SO}_4$  and concentrated in vacuo. The crude product was purified by column chromatography on silica gel (eluent: petroleum ether/EtOAc = 3:1) to afford the product **1s** or **1t**.

### 1-(1-methyl-1H-indol-3-yl)ethanone (1s)

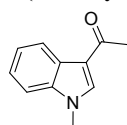

$^1\text{H}$  NMR (600 MHz,  $\text{CDCl}_3$ )  $\delta$  8.37-8.36 (m, 1H), 7.64 (s, 1H), 7.30 (s, 3H), 3.78 (s, 3H), 2.48 (s, 3H);  $^{13}\text{C}$  NMR (150 MHz,  $\text{CDCl}_3$ )  $\delta$  192.9, 137.3, 135.8, 126.1, 123.2, 122.4 (x 2), 116.7, 109.5, 33.4, 27.5.

### 1-(1-benzyl-1H-indol-3-yl)ethanone (1t)

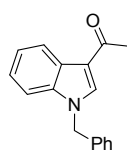

$^1\text{H}$  NMR (600 MHz,  $\text{CDCl}_3$ )  $\delta$  8.40 (d,  $J = 7.8$  Hz, 1H), 7.74 (s, 1H), 7.34-7.25 (m, 6H), 7.14 (d,  $J = 7.2$  Hz, 2H), 5.32 (s, 2H), 2.50 (s, 3H);  $^{13}\text{C}$  NMR (150 MHz,  $\text{CDCl}_3$ )  $\delta$  193.1, 137.0, 135.7, 135.0, 129.0, 128.1, 126.9, 126.3, 123.4, 122.6 (x 2), 117.4, 110.1, 50.6, 27.6.

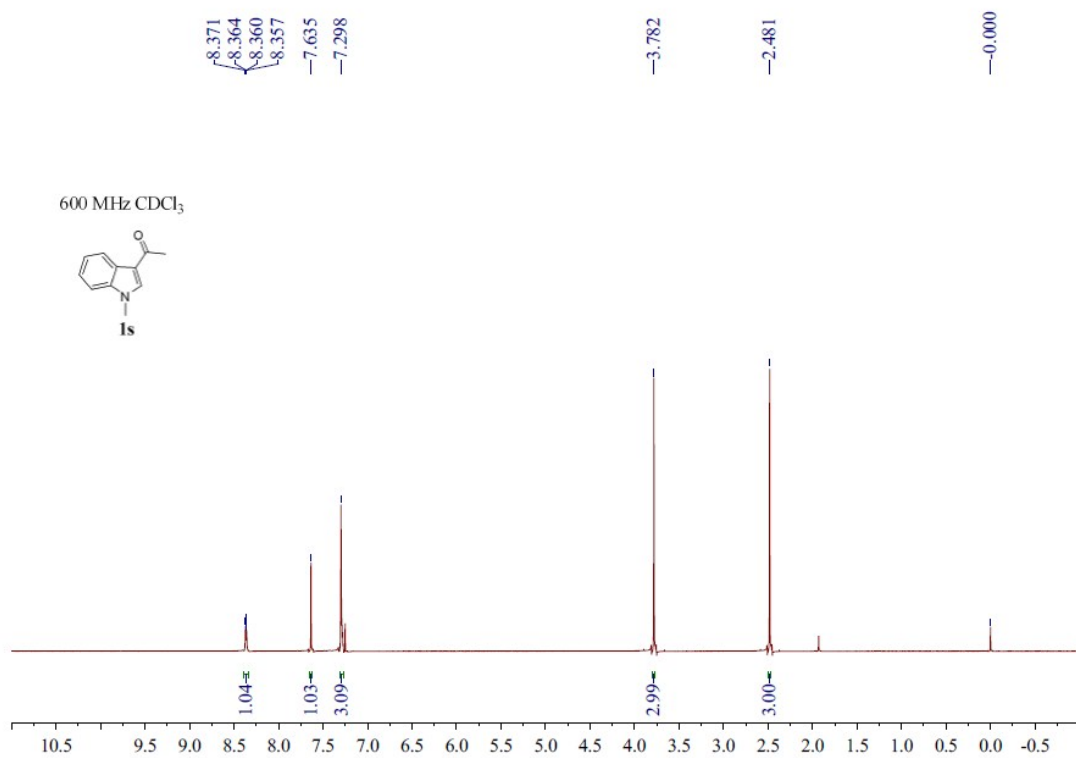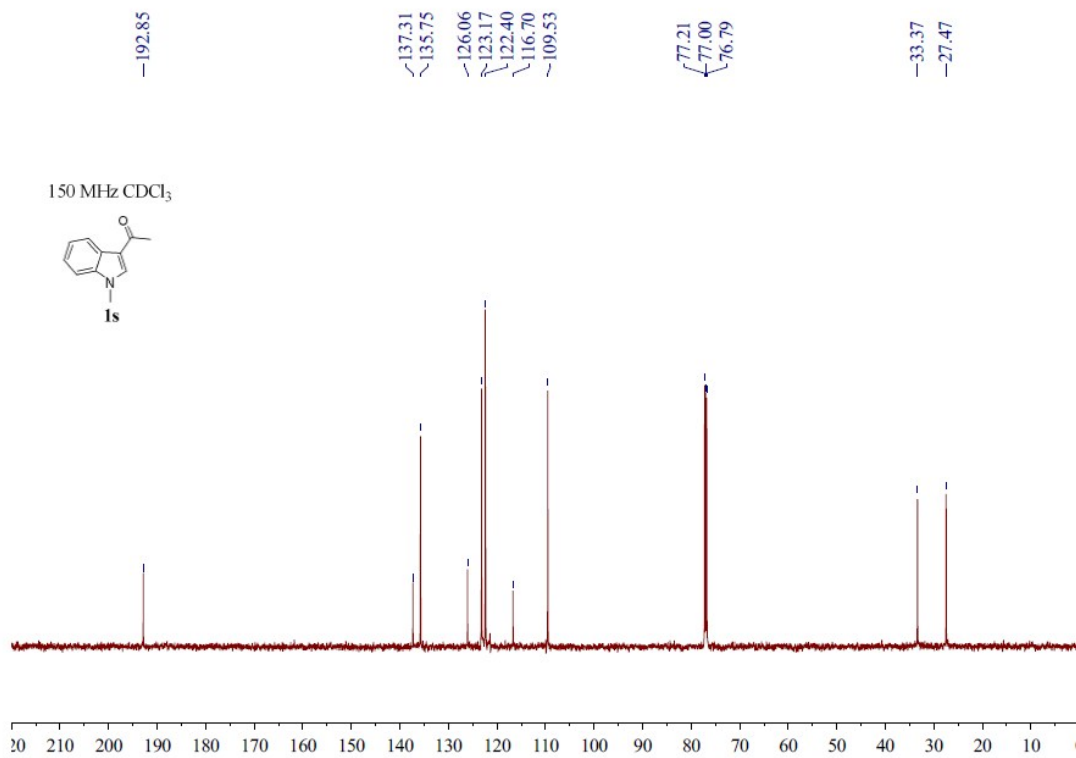

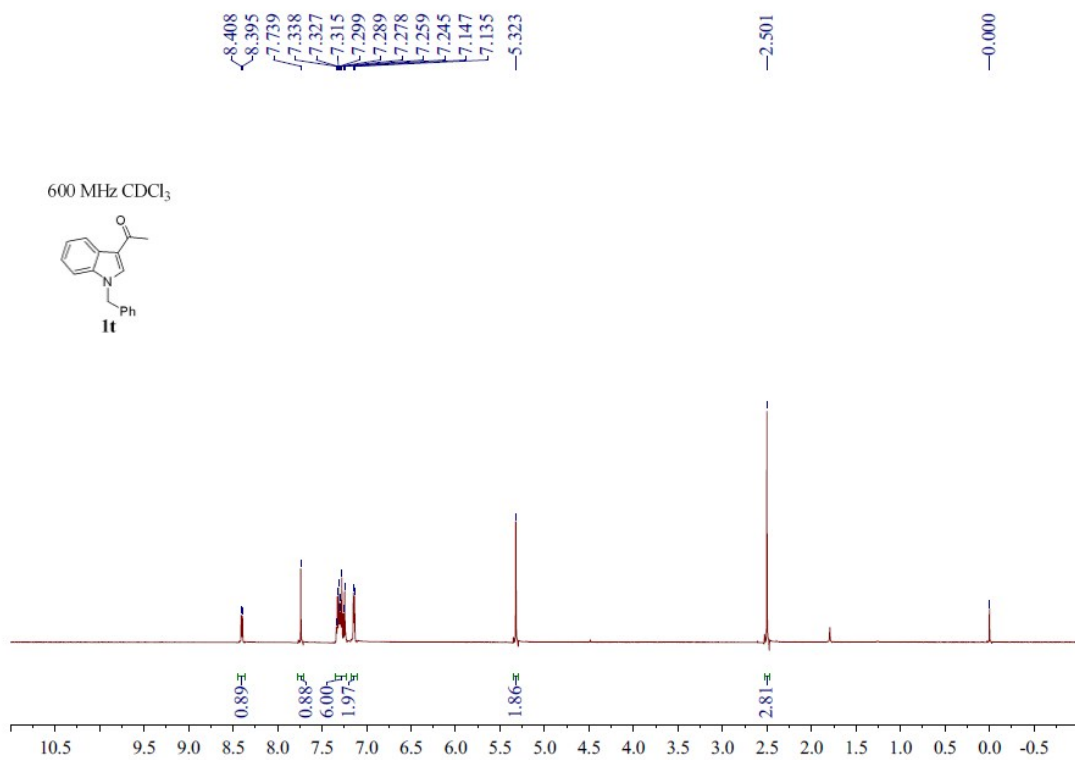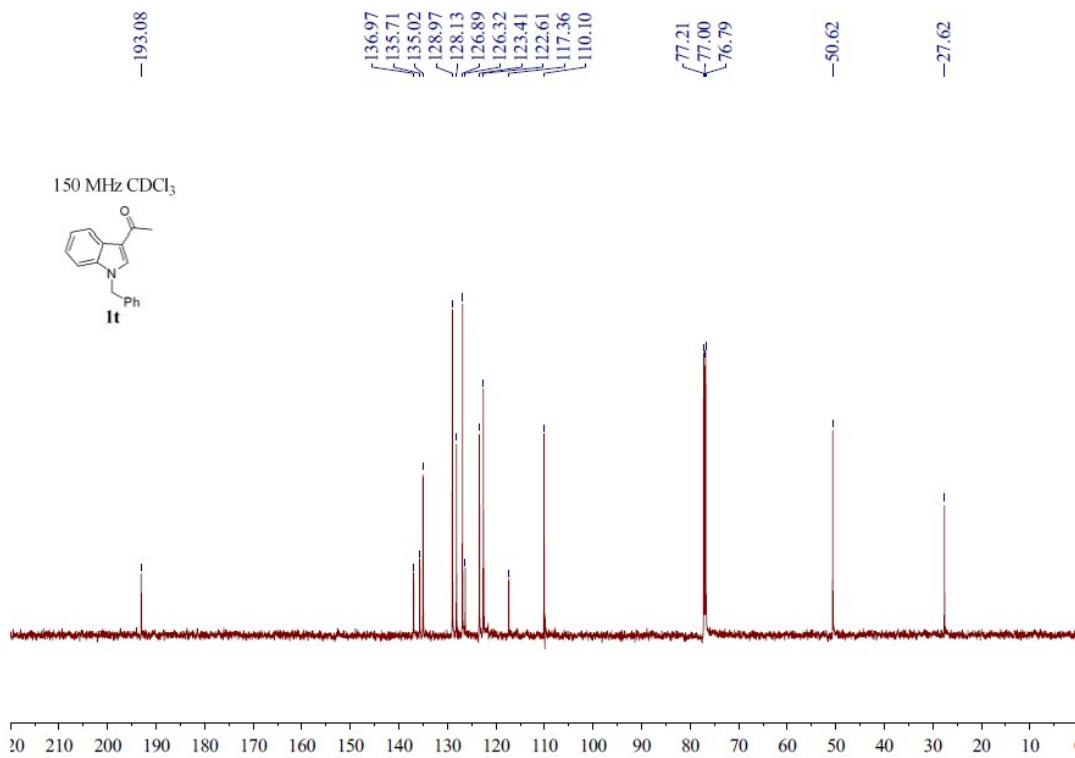

#### 4. Characterization Data of Compounds

##### 2-oxo-2-phenylacetamide (3a) <sup>[1]</sup>

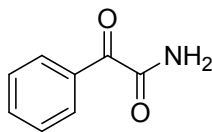

Yield 88%; Yellow solid; mp 69-71 °C; IR (KBr): 3431, 3209, 1663, 1592, 1577, 1231; <sup>1</sup>H NMR (600 MHz, CDCl<sub>3</sub>) δ 8.30 (d, *J* = 7.8 Hz, 2H), 7.64 (t, *J* = 7.2 Hz, 1H), 7.50 (t, *J* = 7.2 Hz, 2H), 7.05 (br, 1H), 6.32 (br, 1H); <sup>13</sup>C NMR (100 MHz, CDCl<sub>3</sub>) δ 187.6, 164.4, 134.4, 132.8, 130.9, 128.5; MS (EI): *m/z* 150.09 (*M* + 1, 0.39%), 149.15 (*M*, 5.70), 105.05 (100).

##### 2-oxo-2-(*p*-tolyl)acetamide (3b) <sup>[1]</sup>

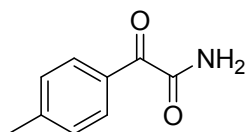

Yield 81%; White solid; mp 131-133 °C; IR (KBr): 3403, 3199, 1686, 1636, 1603, 1237; <sup>1</sup>H NMR (600 MHz, CDCl<sub>3</sub>) δ 8.21 (d, *J* = 7.8 Hz, 2H), 7.28 (d, *J* = 7.8 Hz, 2H), 7.10 (br, 1H), 6.57 (br, 1H), 2.42 (s, 3H); <sup>13</sup>C NMR (100 MHz, CDCl<sub>3</sub>) δ 187.0, 164.7, 145.7, 131.2, 130.4, 129.3, 21.8; MS (EI): *m/z* 164.20 (*M* + 1, 0.18%), 163.16 (*M*, 5.53), 119.10 (100).

##### 2-(4-methoxyphenyl)-2-oxoacetamide (3c) <sup>[1]</sup>

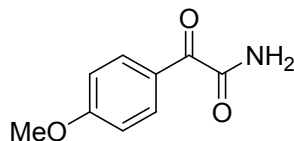

Yield 89%; Yellow solid; mp 145-147 °C; IR (KBr): 3458, 3198, 1707, 1650, 1604, 1566, 1245, 1169; <sup>1</sup>H NMR (600 MHz, DMSO-*d*<sub>6</sub>) δ 8.27 (br, 1H), 7.97 (d, *J* = 9.0 Hz, 2H), 7.92 (br, 1H), 7.10 (d, *J* = 8.4 Hz, 2H), 3.86 (s, 3H); <sup>13</sup>C NMR (150 MHz, DMSO-*d*<sub>6</sub>) δ 189.3, 167.6, 164.2, 132.3, 125.6, 114.4, 55.8; MS (EI): *m/z* 180.18 (*M* + 1, 1.04%), 179.25 (*M*, 8.76), 135.15 (100).

##### 2-(3-methoxyphenyl)-2-oxoacetamide (3d)

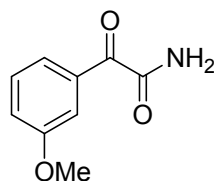

Yield 83%; Yellow solid; mp 96-97 °C; IR (KBr): 3422, 3172, 1707, 1654, 1592, 1263; <sup>1</sup>H NMR (600 MHz, DMSO-*d*<sub>6</sub>) δ 8.34 (br, 1H), 8.00 (br, 1H), 7.56 (d, *J* = 7.2 Hz, 1H), 7.51 (t, *J* = 7.8 Hz, 1H), 7.45 (s, 1H), 7.30 (d, *J* = 8.4 Hz, 1H), 3.82 (s, 3H); <sup>13</sup>C NMR (150 MHz, DMSO-*d*<sub>6</sub>) δ 190.6, 167.2, 159.4, 134.1, 130.3, 122.6, 120.7, 113.5, 55.4; HRMS (ESI): *m/z* [*M* + Na]<sup>+</sup> calcd for C<sub>9</sub>H<sub>9</sub>NNaO<sub>3</sub>: 202.0475; found: 202.0476.

##### 2-(2-methoxyphenyl)-2-oxoacetamide (3e)

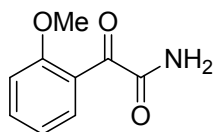

Yield 78%; Yellow solid; mp 120-121 °C; IR (KBr): 3411, 3181, 1696, 1673, 1651, 1599, 1293; <sup>1</sup>H NMR (600 MHz, DMSO-*d*<sub>6</sub>) δ 8.02 (br, 1H), 7.64 (br, 1H), 7.61 (t, *J* = 7.2 Hz, 2H), 7.18 (d, *J* = 8.4 Hz, 1H), 7.09-7.07 (m, 1H), 3.80 (s, 3H); <sup>13</sup>C NMR (150 MHz, DMSO-*d*<sub>6</sub>) δ 191.7, 167.8, 159.5, 135.2, 130.3, 124.1, 120.8, 112.8, 56.1; HRMS (ESI): *m/z* [M + Na]<sup>+</sup> calcd for C<sub>9</sub>H<sub>9</sub>NNaO<sub>3</sub>: 202.0475; found: 202.0477.

### 2-(4-ethoxyphenyl)-2-oxoacetamide (3f)

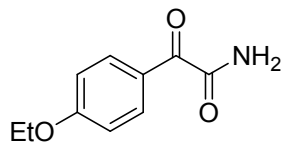

Yield 84%; Yellow solid; mp 111-113 °C; IR (KBr): 3396, 3312, 3257, 1684, 1656, 1600, 1566; <sup>1</sup>H NMR (600 MHz, DMSO-*d*<sub>6</sub>) δ 8.26 (br, 1H), 7.96 (d, *J* = 8.4 Hz, 2H), 7.92 (br, 1H), 7.08 (d, *J* = 8.4 Hz, 2H), 4.13 (q, *J* = 6.6 Hz, 2H), 1.34 (t, *J* = 7.2 Hz, 3H); <sup>13</sup>C NMR (150 MHz, DMSO-*d*<sub>6</sub>) δ 189.3, 167.6, 163.5, 132.3, 125.5, 114.7, 63.8, 14.5; HRMS (ESI): *m/z* [M + Na]<sup>+</sup> calcd for C<sub>10</sub>H<sub>11</sub>NNaO<sub>3</sub>: 216.0631; found: 216.0633.

### 2-(benzo[*d*][1,3]dioxol-5-yl)-2-oxoacetamide (3g)

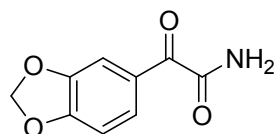

Yield 76%; Yellow solid; mp 174-176 °C; IR (KBr): 3426, 3199, 1707, 1648, 1591, 1256; <sup>1</sup>H NMR (400 MHz, DMSO-*d*<sub>6</sub>) δ 8.26 (br, 1H), 7.91 (br, 1H), 7.64-7.62 (m, 1H), 7.41 (s, 1H), 7.09 (d, *J* = 8.4 Hz, 1H), 6.17 (s, 2H). <sup>13</sup>C NMR (100 MHz, DMSO-*d*<sub>6</sub>) δ 188.9, 167.3, 152.7, 148.1, 127.5, 127.3, 108.4, 107.8, 102.4; HRMS (ESI): *m/z* [M + Na]<sup>+</sup> calcd for C<sub>9</sub>H<sub>7</sub>NNaO<sub>4</sub>: 216.0267; found: 216.0270.

### 2-(2,3-dihydrobenzo[*b*][1,4]dioxin-6-yl)-2-oxoacetamide (3h)

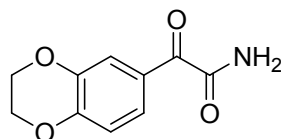

Yield 86%; Yellow solid; mp 158-161 °C; IR (KBr): 3444, 3201, 1691, 1651, 1587, 1292, 1258; <sup>1</sup>H NMR (600 MHz, DMSO-*d*<sub>6</sub>) δ 8.26 (br, 1H), 7.91 (br, 1H), 7.53-7.51 (m, 1H), 7.46 (s, 1H), 7.03 (d, *J* = 8.4 Hz, 1H), 4.36-4.35 (m, 2H), 4.30-4.29 (m, 2H); <sup>13</sup>C NMR (150 MHz, DMSO-*d*<sub>6</sub>) δ 189.1, 167.3, 149.1, 143.4, 126.2, 124.1, 118.4, 117.6, 64.8, 64.0; HRMS (ESI): *m/z* [M + Na]<sup>+</sup> calcd for C<sub>10</sub>H<sub>9</sub>NNaO<sub>4</sub>: 230.0424; found: 230.0426.

### 2-(4-nitrophenyl)-2-oxoacetamide (3i)

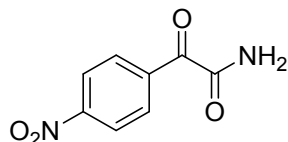

Yield 69%; Yellow solid; mp 157-159 °C; IR (KBr): 3447, 3223, 1713, 1686, 1524, 1349, 1222; <sup>1</sup>H NMR (600 MHz, CDCl<sub>3</sub>) δ 8.52 (d, *J* = 8.4 Hz, 2H), 8.33 (d, *J* = 9.0 Hz, 2H), 7.08 (br, 1H), 6.15 (br, 1H); <sup>13</sup>C NMR (150 MHz, DMSO-*d*<sub>6</sub>) δ 189.0, 165.7, 150.4, 137.6, 131.2, 123.9; HRMS (ESI): *m/z* [M + Na]<sup>+</sup> calcd for C<sub>8</sub>H<sub>6</sub>N<sub>2</sub>NaO<sub>4</sub>: 217.0220; found: 217.0218.

### 2-([1,1'-biphenyl]-4-yl)-2-oxoacetamide (3j)

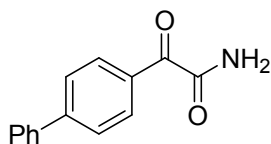

Yield 82%; White solid; mp 177-179 °C; IR (KBr): 3426, 1662, 1599, 1405, 1241, 751; <sup>1</sup>H NMR (600 MHz, DMSO-*d*<sub>6</sub>) δ 8.36 (br, 1H), 8.07 (d, *J* = 7.8 Hz, 2H), 8.03 (br, 1H), 7.90 (d, *J* = 8.4 Hz, 2H), 7.77 (d, *J* = 7.8 Hz, 2H), 7.53-7.51 (m, 2H), 7.46-7.44 (m, 1H); <sup>13</sup>C NMR (150 MHz, DMSO-*d*<sub>6</sub>) δ 190.3, 167.2, 145.7, 138.7, 131.6, 130.4, 129.2, 128.7, 127.1 (x 2); HRMS (ESI): *m/z* [M + Na]<sup>+</sup> calcd for C<sub>14</sub>H<sub>11</sub>NNaO<sub>2</sub>: 248.0682; found: 248.0683.

### 2-(4-fluorophenyl)-2-oxoacetamide (3k) [1]

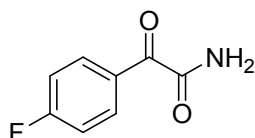

Yield 87%; Yellow solid; mp 150-151 °C; IR (KBr): 3454, 3200, 1717, 1668, 1580, 1229; <sup>1</sup>H NMR (600 MHz, DMSO-*d*<sub>6</sub>) δ 8.35 (br, 1H), 8.09-8.07 (m, 2H), 8.04 (br, 1H), 7.42-7.39 (m, 2H); <sup>13</sup>C NMR (150 MHz, DMSO-*d*<sub>6</sub>) δ 189.1, 166.8, 166.6, 164.9, 132.9, 129.6, 116.3, 116.1; MS (EI): *m/z* 168.16 (M + 1, 0.54%), 167.19 (M, 7.55), 123.07 (100).

### 2-(4-chlorophenyl)-2-oxoacetamide (3l)

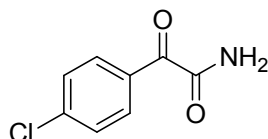

Yield 86%; Yellow solid; mp 130-131 °C; IR (KBr): 3433, 3205, 1713, 1664, 1579, 1234; <sup>1</sup>H NMR (600 MHz, CDCl<sub>3</sub>) δ 8.30 (d, *J* = 8.4 Hz, 2H), 7.46 (d, *J* = 9.0 Hz, 2H), 7.07 (br, 1H), 6.31 (br, 1H); <sup>13</sup>C NMR (150 MHz, DMSO-*d*<sub>6</sub>) δ 189.4, 166.5, 139.5, 131.6, 131.5, 129.2; HRMS (ESI): *m/z* [M + Na]<sup>+</sup> calcd for C<sub>8</sub>H<sub>6</sub>ClNNaO<sub>2</sub>: 205.9979; found: 205.9978.

### 2-(4-bromophenyl)-2-oxoacetamide (3m) [1]

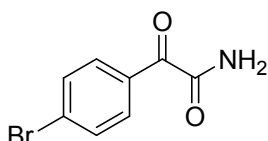

Yield 85%; Yellow solid; mp 123-125 °C; IR (KBr): 3422, 3222, 1687, 1659, 1580, 1230; <sup>1</sup>H NMR (600 MHz, CDCl<sub>3</sub>) δ 8.20 (d, *J* = 8.4 Hz, 2H), 7.63 (d, *J* = 7.8 Hz, 2H), 7.09 (br, 1H), 6.41 (br, 1H); <sup>13</sup>C NMR (100 MHz, CDCl<sub>3</sub>) δ 186.1, 163.5, 132.6, 131.9, 131.7, 130.3; MS (EI): *m/z* 229.20 (M + 1, 6.38%), 228.63 (M, 1.18), 183.06 (100).

### 2-(3,4-dichlorophenyl)-2-oxoacetamide (3n)

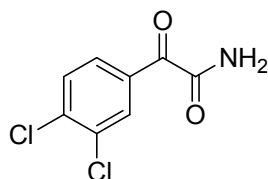

Yield 67%; Yellow solid; mp 188-189 °C; IR (KBr): 3453, 3210, 1709, 1668, 1222; <sup>1</sup>H NMR (600

MHz, DMSO- $d_6$ )  $\delta$  8.39 (br, 1H), 8.17 (s, 1H), 8.11 (br, 1H), 7.96 (d,  $J = 8.4$  Hz, 1H), 7.85 (d,  $J = 8.4$  Hz, 1H);  $^{13}\text{C}$  NMR (150 MHz, DMSO- $d_6$ )  $\delta$  187.8, 165.5, 137.3, 133.1, 131.9, 131.4, 131.3, 129.9; HRMS (ESI):  $m/z$   $[\text{M} + \text{Na}]^+$  calcd for  $\text{C}_8\text{H}_5\text{Cl}_2\text{NNaO}_2$ : 239.9590; found: 239.9590.

### 2-(naphthalen-2-yl)-2-oxoacetamide (3o)<sup>[1]</sup>

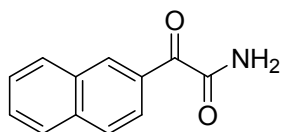

Yield 80%; Pink solid; mp 194-196 °C; IR (KBr): 3409, 3208, 1694, 1665, 1595, 1222;  $^1\text{H}$  NMR (600 MHz, DMSO- $d_6$ )  $\delta$  8.67 (s, 1H), 8.45 (br, 1H), 8.17 (d,  $J = 7.8$  Hz, 1H), 8.10 (br, 1H), 8.07 (d,  $J = 8.4$  Hz, 1H), 8.02-7.99 (m, 2H), 7.72-7.69 (m, 1H), 7.65-7.62 (m, 1H);  $^{13}\text{C}$  NMR (150 MHz, DMSO- $d_6$ )  $\delta$  190.9, 167.3, 135.6, 132.8, 132.0, 130.1, 129.9, 129.5, 128.8, 127.9, 127.3, 123.9; MS (EI):  $m/z$  200.23 (M + 1, 2.71%), 199.25 (M, 20.83), 155.15 (100).

### 2-(naphthalen-1-yl)-2-oxoacetamide (3p)

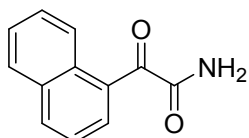

Yield 58%; Yellow solid; mp 159-160 °C; IR (KBr): 3413, 3219, 1716, 1677, 1241;  $^1\text{H}$  NMR (600 MHz, DMSO- $d_6$ )  $\delta$  8.81 (d,  $J = 8.4$  Hz, 1H), 8.45 (br, 1H), 8.27 (d,  $J = 8.4$  Hz, 1H), 8.08 (br, 1H), 8.08-8.07 (m, 2H), 7.73-7.63 (m, 3H);  $^{13}\text{C}$  NMR (150 MHz, DMSO- $d_6$ )  $\delta$  193.7, 167.6, 134.8, 133.5, 133.3 (1), 133.2 (7), 130.3, 128.9 (4), 128.8 (9), 128.8, 126.8, 124.9; HRMS (ESI):  $m/z$   $[\text{M} + \text{Na}]^+$  calcd for  $\text{C}_{12}\text{H}_9\text{NNaO}_2$ : 222.0526; found: 222.0529.

### 2-oxo-2-(thiophen-2-yl)acetamide (3q)

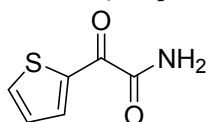

Yield 43%; Brown solid; mp 83-85 °C; IR (KBr): 3443, 2923, 1707, 1648, 1410, 1348, 1244;  $^1\text{H}$  NMR (600 MHz, DMSO- $d_6$ )  $\delta$  8.31 (br, 1H), 8.16 (d,  $J = 4.8$  Hz, 1H), 8.13 (d,  $J = 4.2$  Hz, 1H), 7.99 (br, 1H), 7.29-7.28 (m, 1H);  $^{13}\text{C}$  NMR (150 MHz, DMSO- $d_6$ )  $\delta$  180.6, 164.4, 138.8, 137.4, 137.3, 128.8; HRMS (ESI):  $m/z$   $[\text{M} + \text{Na}]^+$  calcd for  $\text{C}_6\text{H}_5\text{NNaO}_2\text{S}$ : 177.9933; found: 177.9932.

### 2-(1H-indol-3-yl)-2-oxoacetamide (3r)

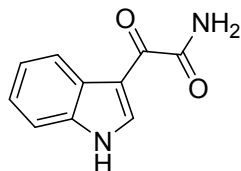

Yield 79%; Brown solid; mp 249-251 °C; IR (KBr): 3396, 3258, 1667, 1615, 1598, 1580, 1408;  $^1\text{H}$  NMR (600 MHz, DMSO- $d_6$ )  $\delta$  12.2 (br, 1H), 8.71 (d,  $J = 3.6$  Hz, 1H), 8.24-8.23 (m, 1H), 8.10 (br, 1H), 7.73 (br, 1H), 7.54-7.53 (m, 1H), 7.27-7.24 (m, 2H);  $^{13}\text{C}$  NMR (150 MHz, DMSO- $d_6$ )  $\delta$  183.0, 166.1, 136.4, 126.2, 123.5, 122.6, 121.4, 121.3, 112.6, 112.2; HRMS (ESI):  $m/z$   $[\text{M} + \text{Na}]^+$  calcd for  $\text{C}_{10}\text{H}_8\text{N}_2\text{NaO}_2$ : 211.0478; found: 211.0481.

### 2-(1-methyl-1H-indol-3-yl)-2-oxoacetamide (3s)



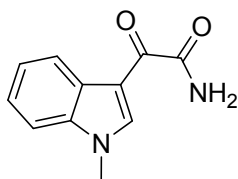

Yield 73%; Brown solid; mp 178-180 °C; IR (KBr): 3373, 3220, 3056, 2908, 1705, 1626, 1591, 1519, 1347; <sup>1</sup>H NMR (600 MHz, DMSO-*d*<sub>6</sub>) δ 7.86 (s, 1H), 7.36 (d, *J* = 7.8 Hz, 1H), 7.23 (br, 1H), 6.87 (br, 1H), 6.69 (d, *J* = 7.8 Hz, 1H), 6.45-6.40 (m, 2H), 3.02 (s, 3H); <sup>13</sup>C NMR (150 MHz, DMSO-*d*<sub>6</sub>) δ 182.4, 166.0, 141.7, 137.0, 126.7, 123.4, 122.9, 121.5, 121.3, 111.0, 33.3; HRMS (ESI): *m/z* [M + Na]<sup>+</sup> calcd for C<sub>11</sub>H<sub>10</sub>N<sub>2</sub>NaO<sub>2</sub>: 225.0635; found: 225.0638.

**2-(1-benzyl-1H-indol-3-yl)-2-oxoacetamide (3t)**

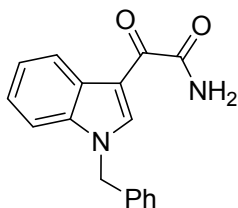

Yield 71%; Brown solid; mp 184-186 °C; IR (KBr): 3392, 3191, 3128, 2922, 2852, 1697, 1624, 1593, 1515, 1355, 1175; <sup>1</sup>H NMR (600 MHz, DMSO-*d*<sub>6</sub>) δ 8.93 (s, 1H), 8.26-8.25 (m, 1H), 8.14 (br, 1H), 7.78 (br, 1H), 7.59-7.57 (m, 1H), 7.34 (t, *J* = 7.2 Hz, 2H), 7.29-7.27 (m, 5H), 5.59 (s, 2H); <sup>13</sup>C NMR (150 MHz, DMSO-*d*<sub>6</sub>) δ 182.7, 165.9, 136.8, 136.3, 129.3, 128.8, 128.7, 128.3, 127.8, 127.4, 127.3, 126.9, 123.5, 111.5, 49.8; HRMS (ESI): *m/z* [M + Na]<sup>+</sup> calcd for C<sub>17</sub>H<sub>14</sub>N<sub>2</sub>NaO<sub>2</sub>: 301.0948; found: 301.0950.

***N*-(1-hydroxy-2-oxo-2-phenylethyl)formamide (A')**

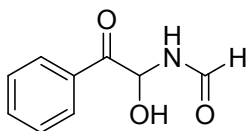

<sup>1</sup>H NMR (600 MHz, DMSO-*d*<sub>6</sub>) δ 9.00 (d, *J* = 8.4 Hz, 1H), 8.12 (s, 1H), 8.00 (d, *J* = 7.2 Hz, 2H), 7.67-7.64 (m, 1H), 7.54 (t, *J* = 7.8 Hz, 2H), 6.77 (d, *J* = 7.2 Hz, 1H), 6.43-6.40 (m, 1H); <sup>13</sup>C NMR (150 MHz, DMSO-*d*<sub>6</sub>) δ 194.6, 161.2, 133.9, 133.8, 128.9, 128.8, 70.9; HRMS (ESI): *m/z* [M + Na]<sup>+</sup> calcd for C<sub>9</sub>H<sub>9</sub>NNaO<sub>3</sub>: 202.0475; found: 202.0476.

***N*-formyl-2-oxo-2-phenylacetamide (B)**

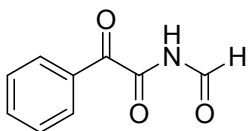

<sup>1</sup>H NMR (600 MHz, DMSO-*d*<sub>6</sub>) δ 11.99 (s, 1H), 9.05 (s, 1H), 8.00 (d, *J* = 7.8 Hz, 2H), 7.78 (t, *J* = 7.2 Hz, 1H), 7.62 (t, *J* = 7.8 Hz, 2H); HRMS (ESI): *m/z* [M + Na]<sup>+</sup> calcd for C<sub>9</sub>H<sub>7</sub>NNaO<sub>3</sub>: 200.0318; found: 200.0317.

**6-(4-methoxyphenyl)-3-thioxo-3,4-dihydro-1,2,4-triazin-5(2H)-one (4)** <sup>[2]</sup>

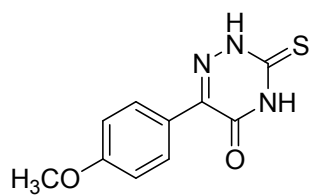

Yield 85%; Yellow solid; <sup>1</sup>H NMR (600 MHz, DMSO-*d*<sub>6</sub>) δ 13.61 (br, 1H), 13.20 (br, 1H), 7.92 (d, *J* = 9.0 Hz, 2H), 7.01 (d, *J* = 9.0 Hz, 2H), 3.80 (s, 3H); <sup>13</sup>C NMR (150 MHz, DMSO-*d*<sub>6</sub>) δ 172.7, 160.8, 153.0, 145.2, 129.7, 124.1, 113.7, 55.4; MS (EI): *m/z* 237.08 (*M* + 2, 5.28%), 236.02 (*M* + 1, 12.73), 235.02 (100).

**Reference:**

- (1) Z. Zhang, J. Su, Z. Zha and Z. Wang, *Chem. Commun.*, 2013, **49**, 8982.
- (2) F. M. Adam, A. J. Burton, K. S. Cardwell, R. A. Cox, R. A. Henson, K. Mills, J. C. Prodger, M. B. Schilling and D. T. Tape, *Tetrahedron Lett.*, 2003, **44**, 5657.

## 5. $^1\text{H}$ and $^{13}\text{C}$ NMR Spectra of Compounds

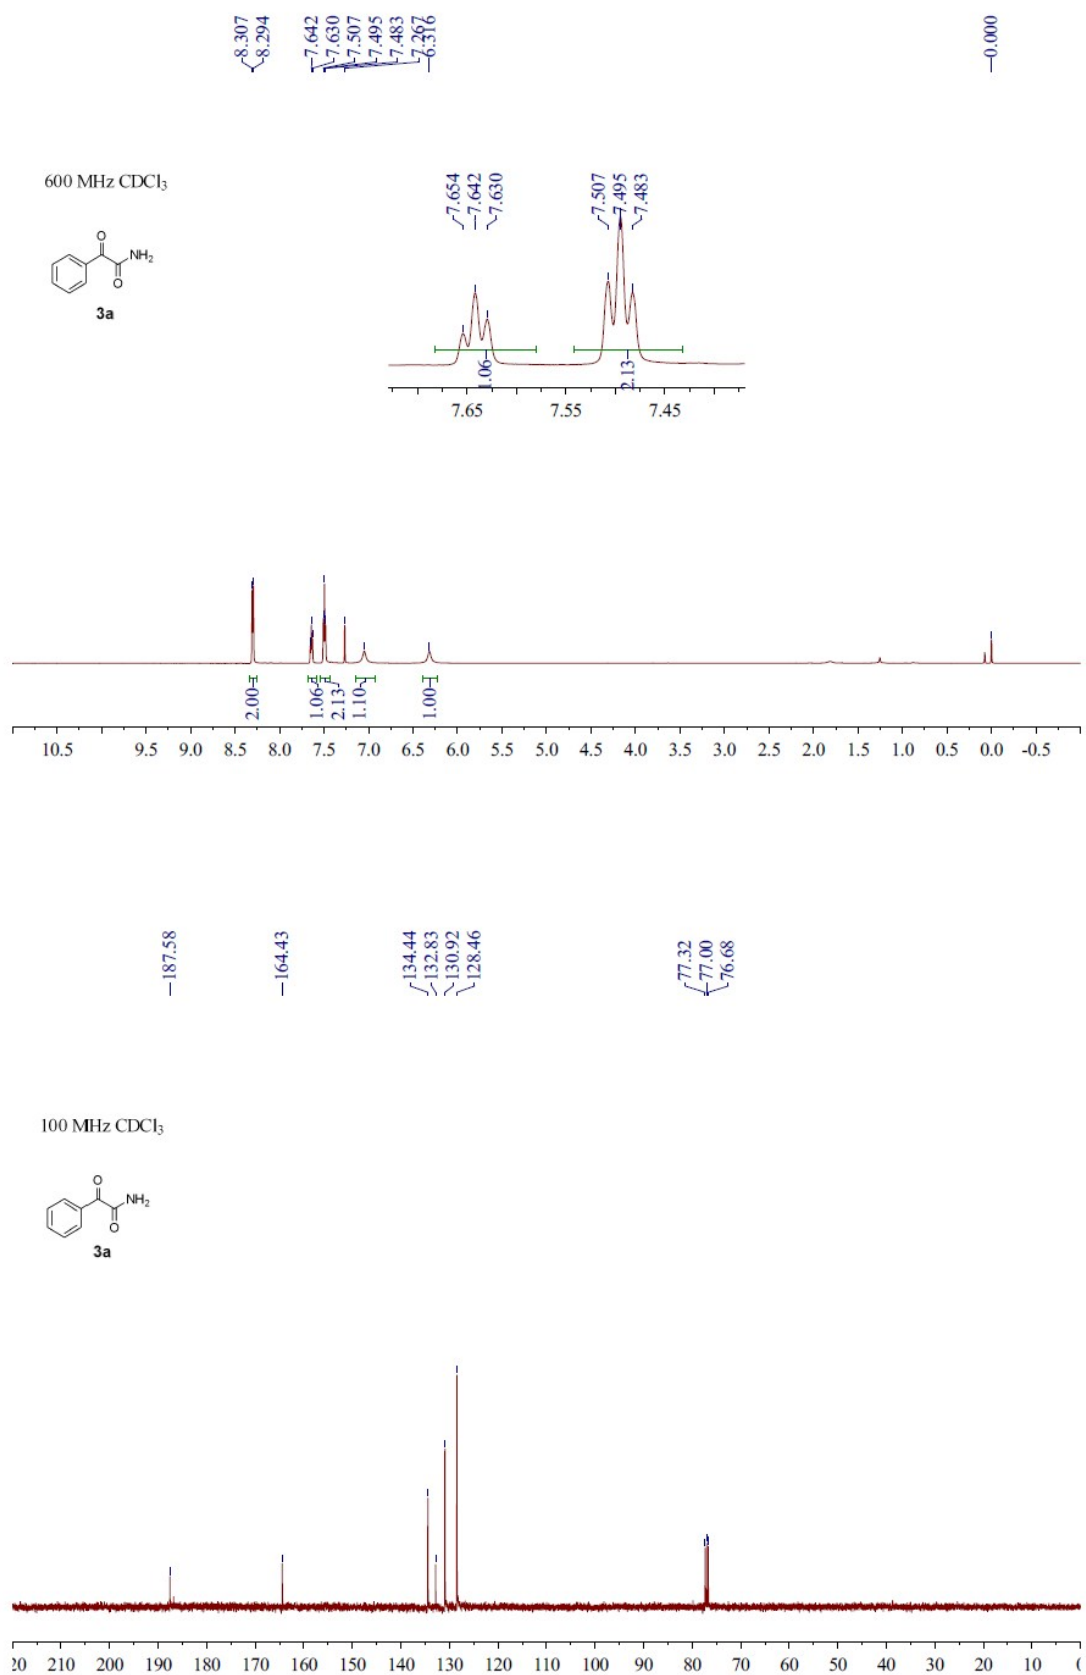

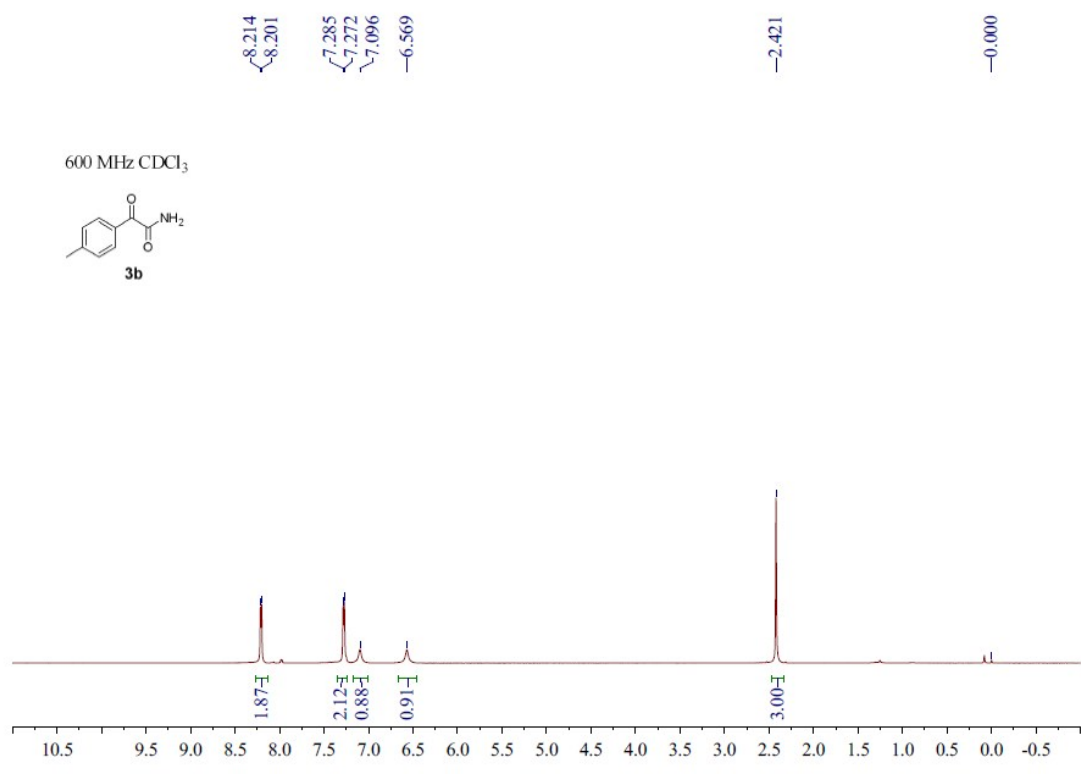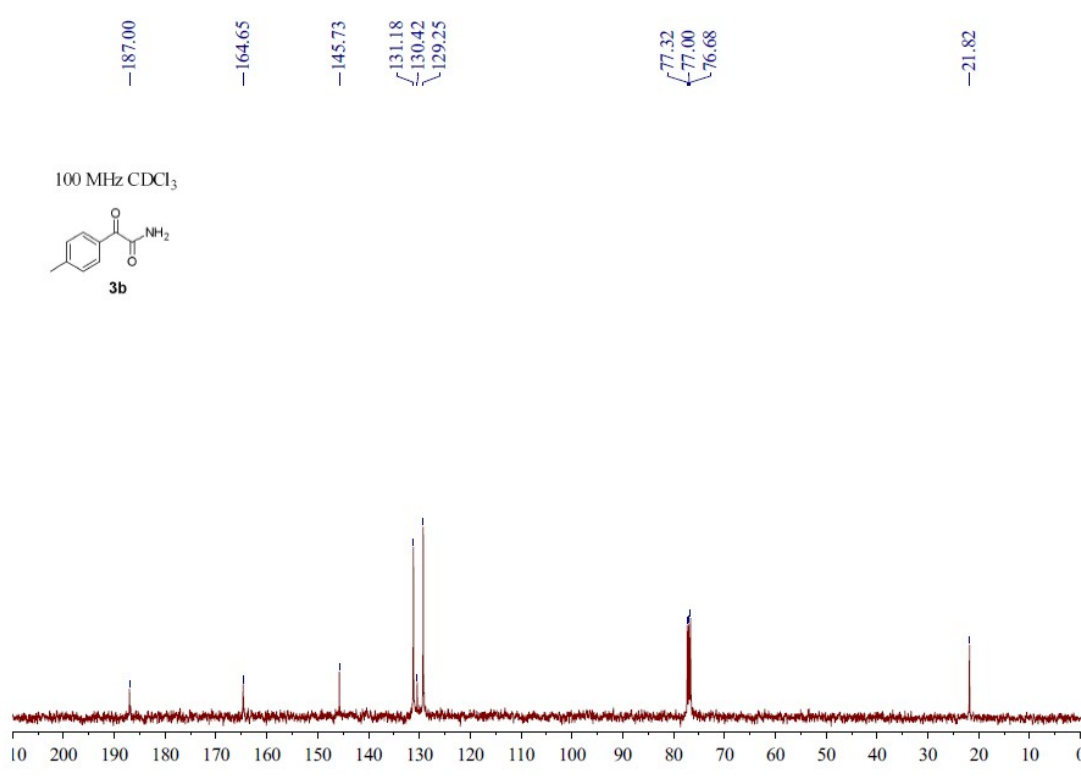

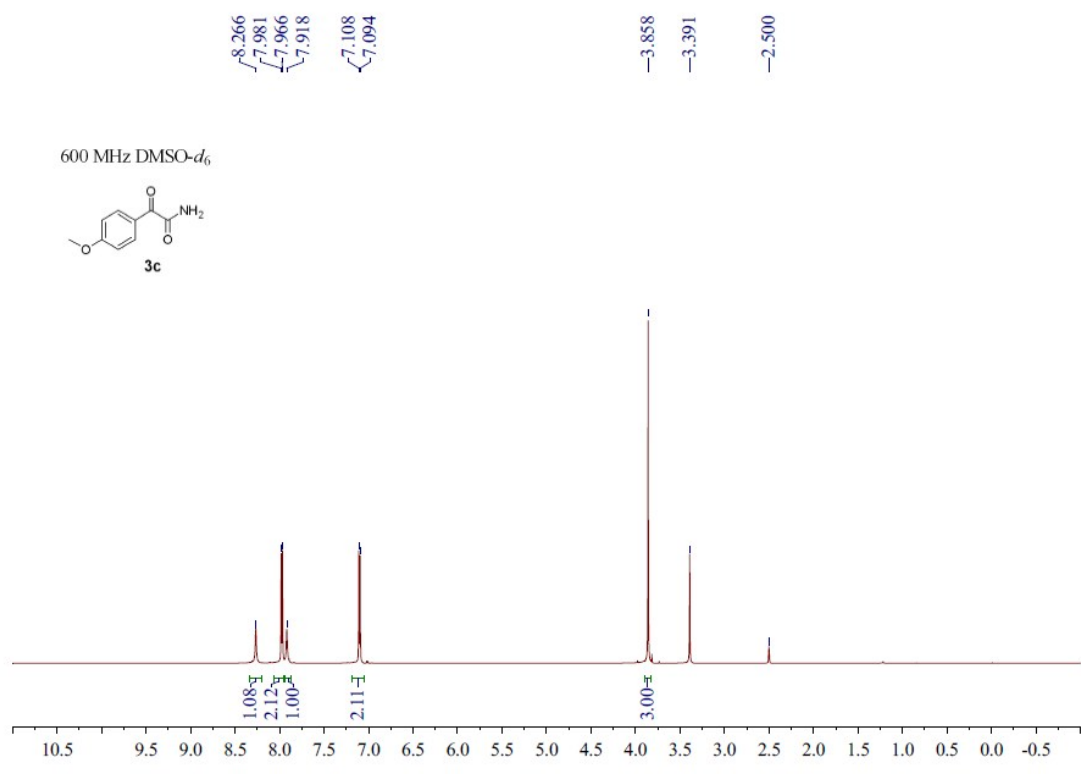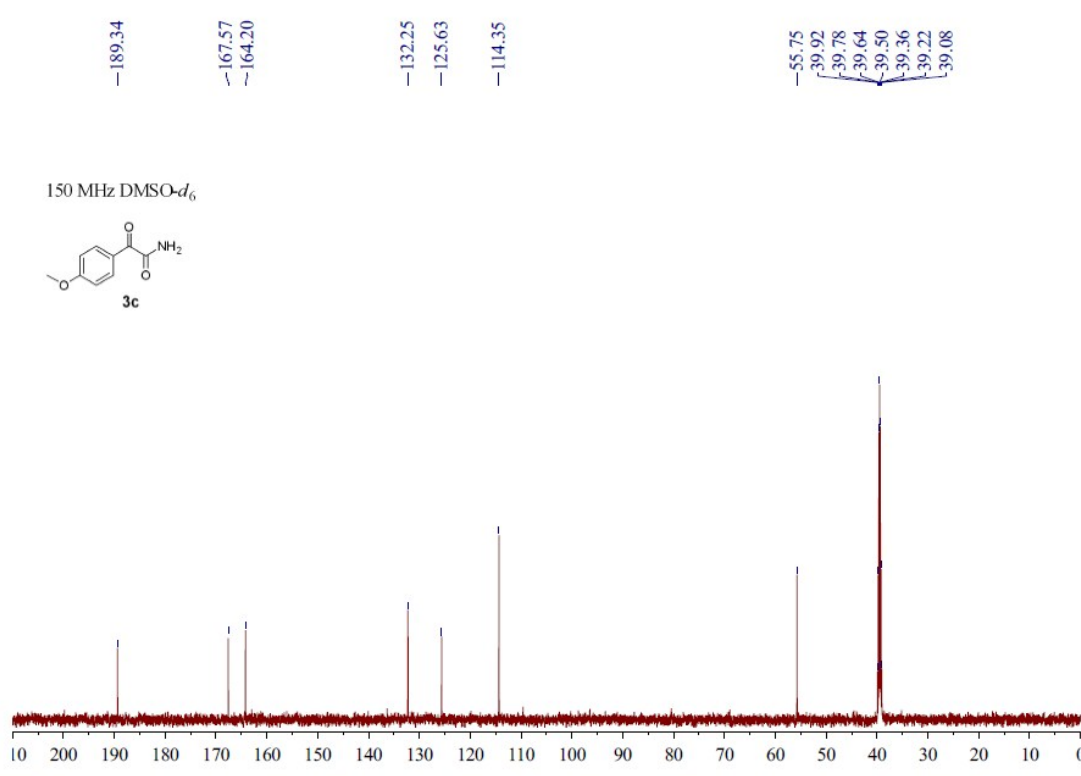

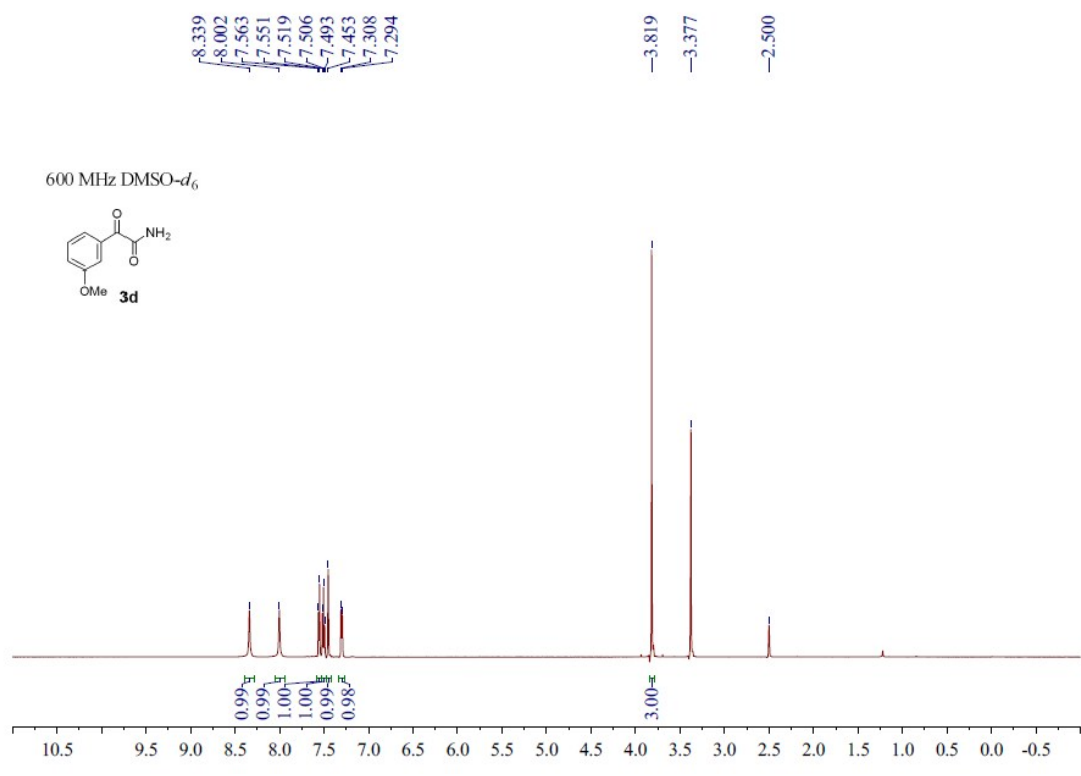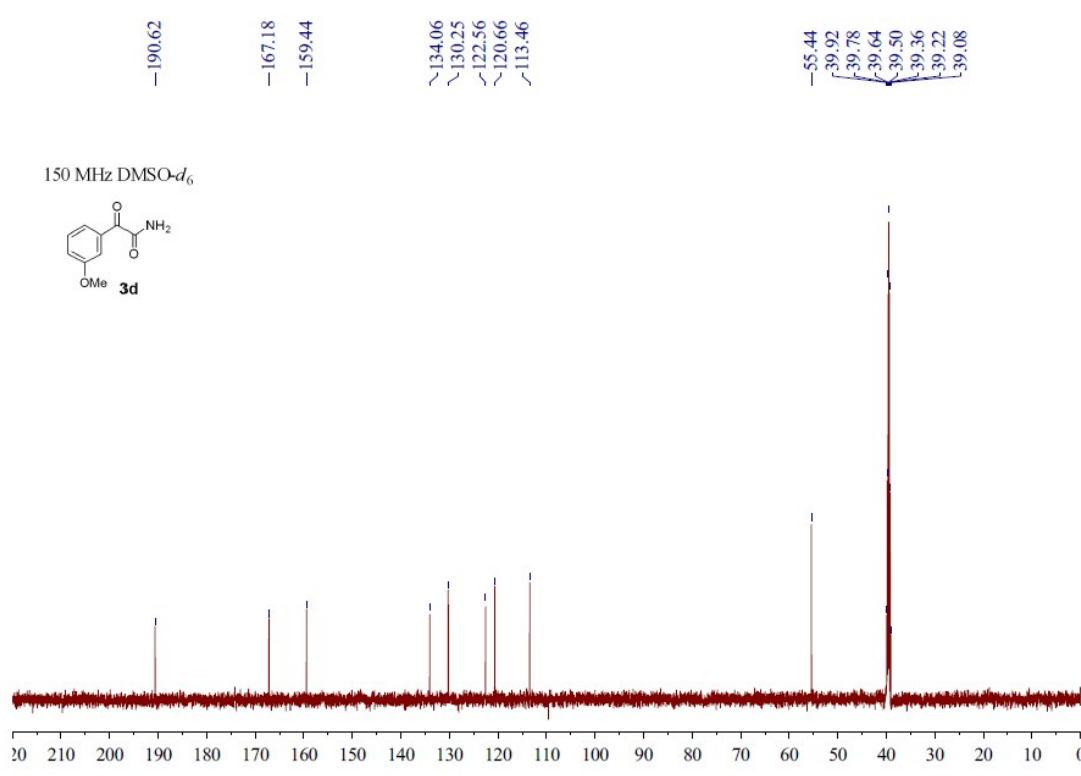

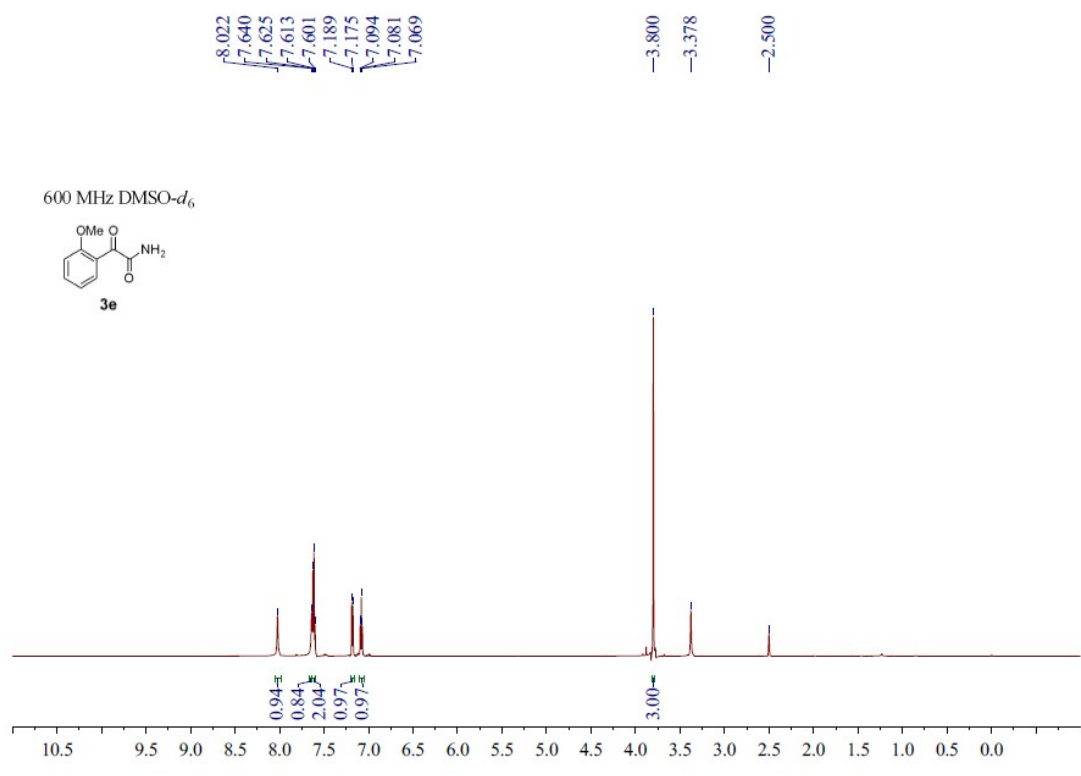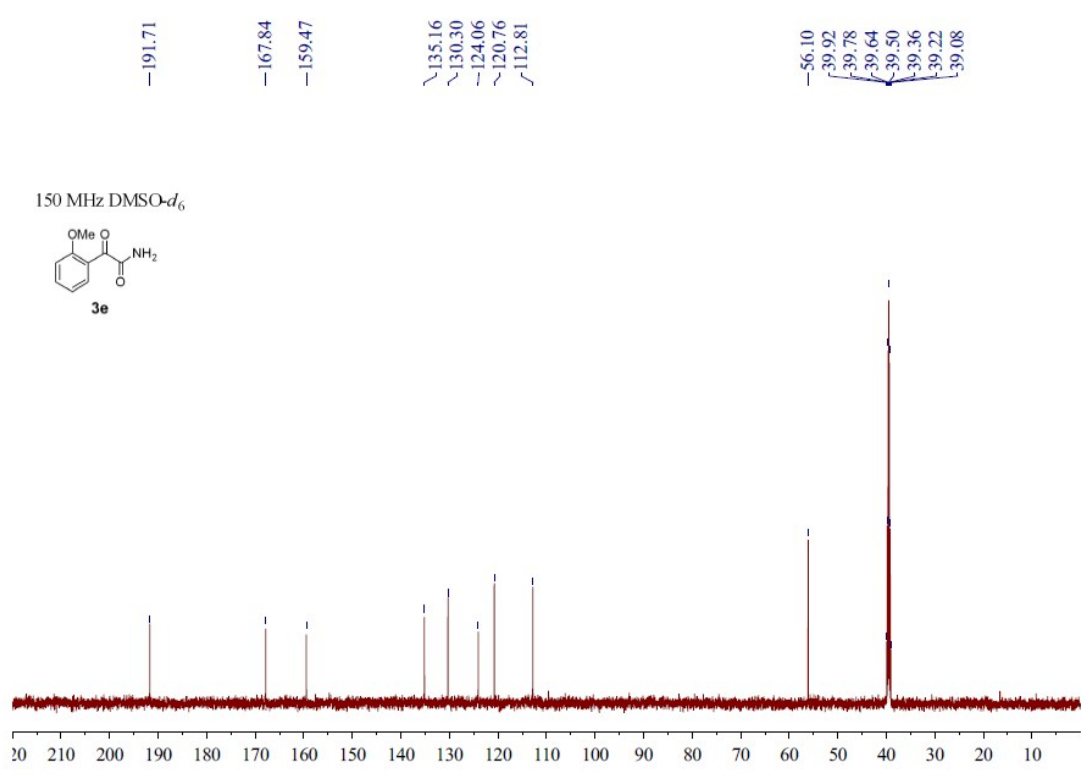

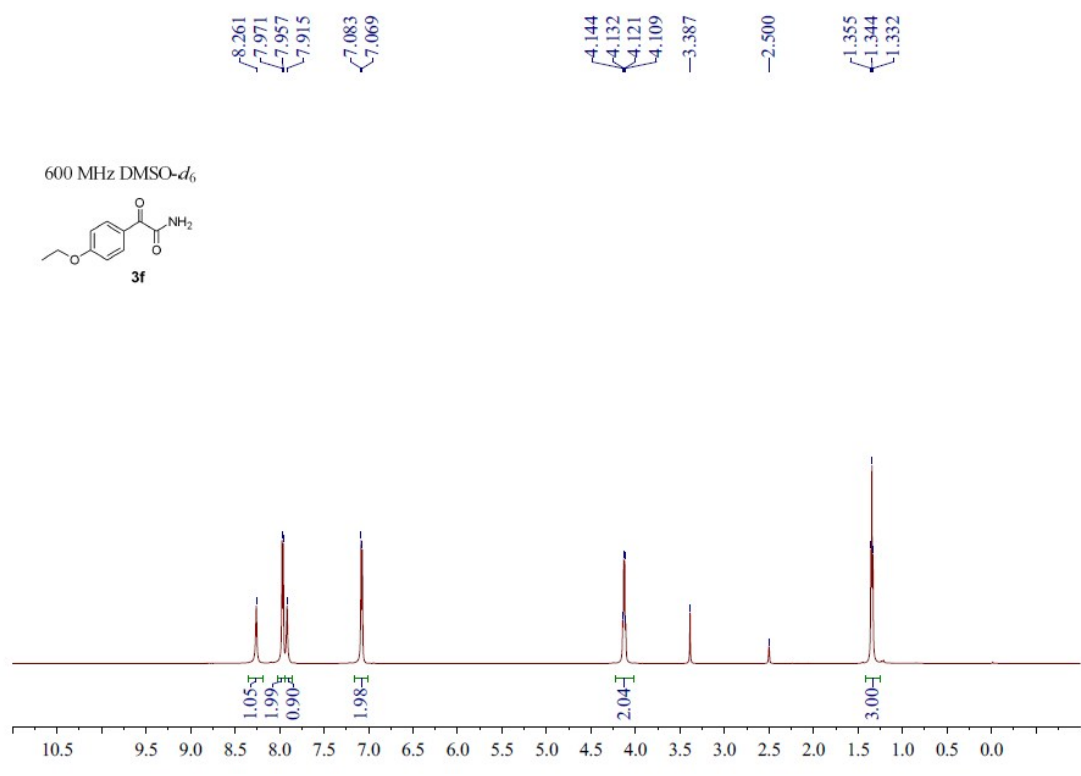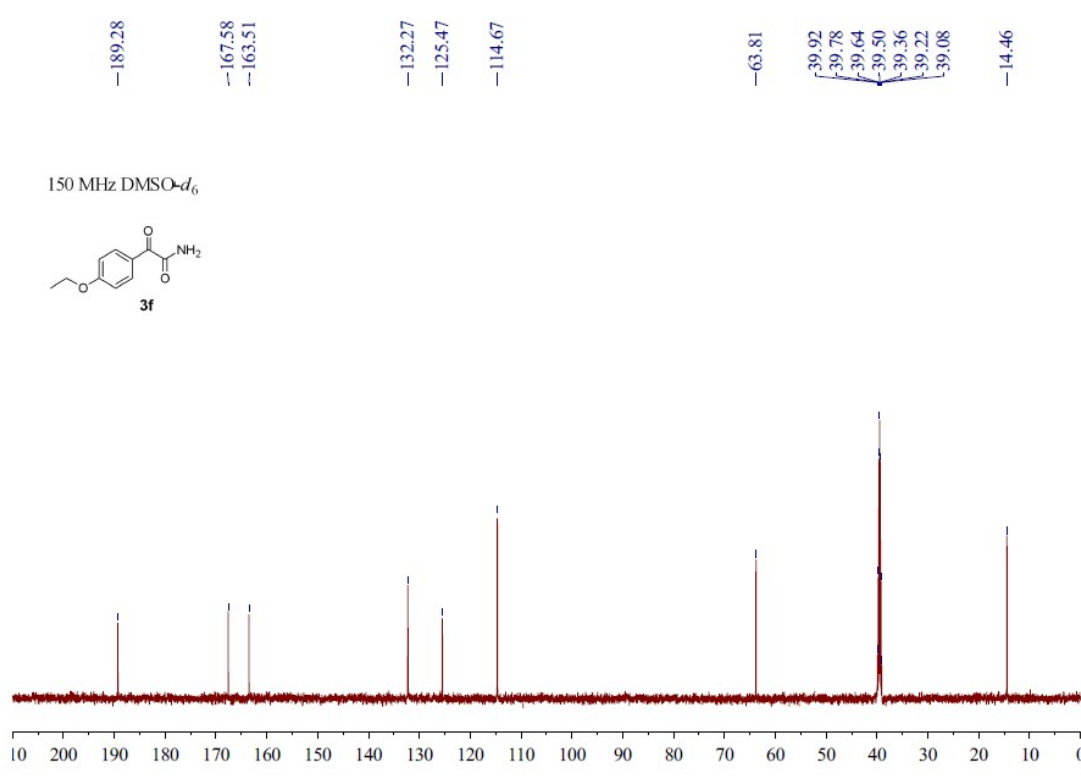



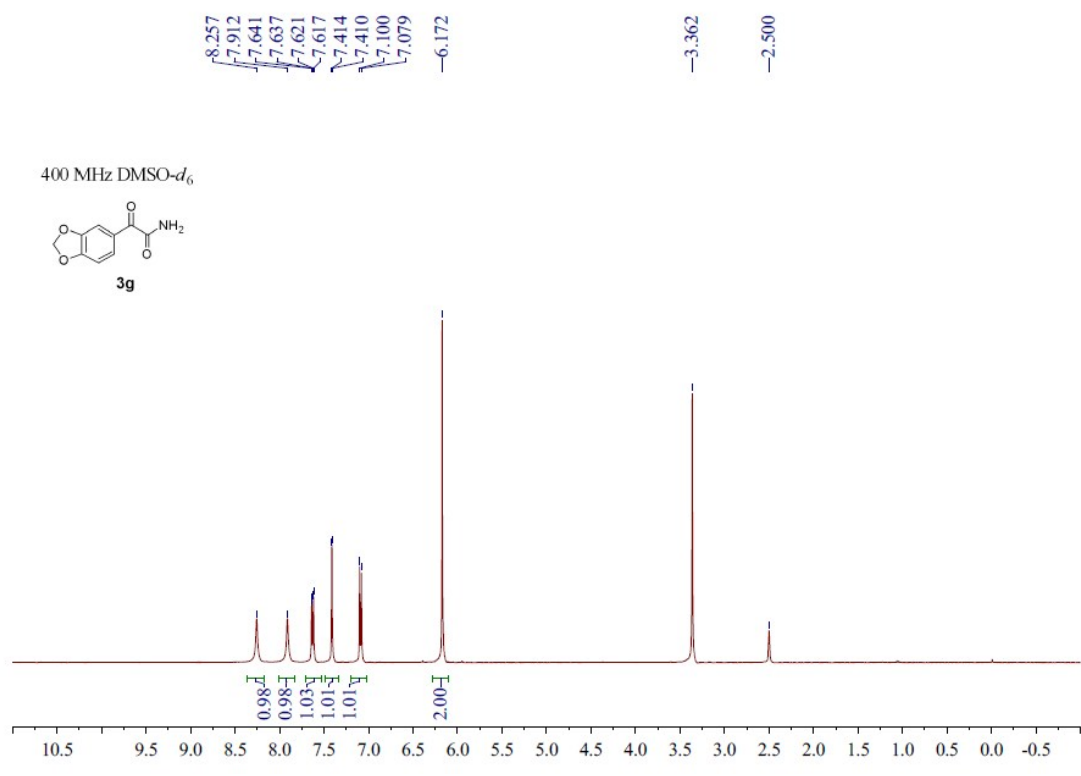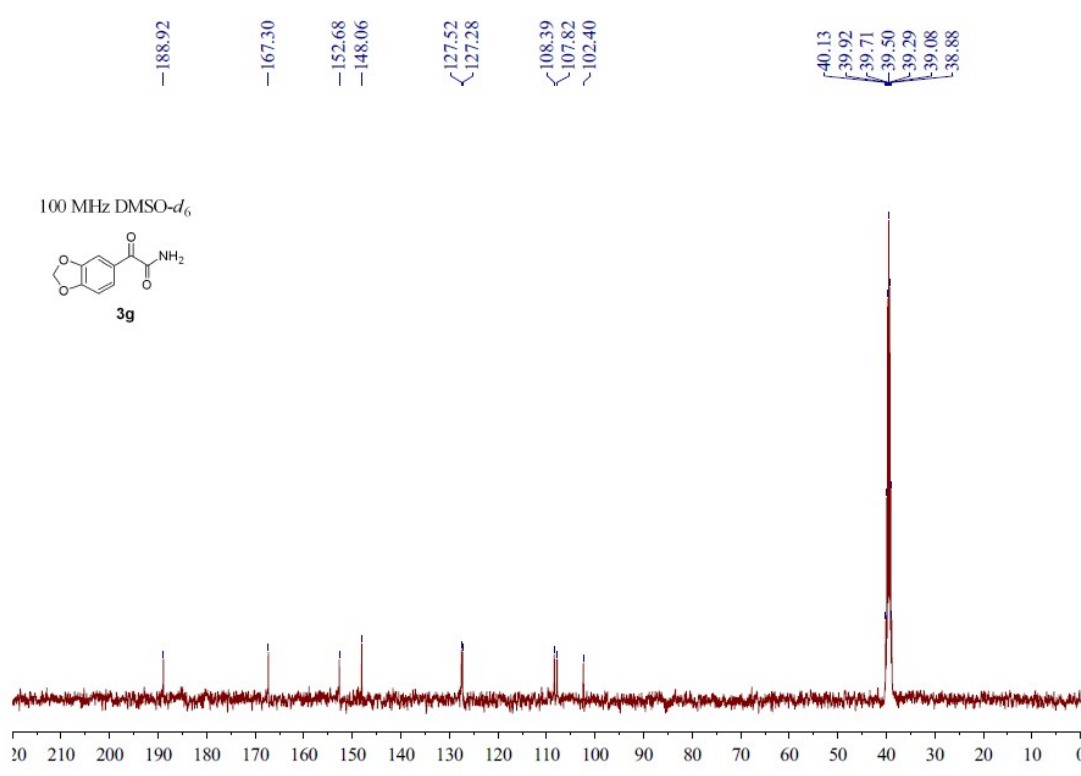

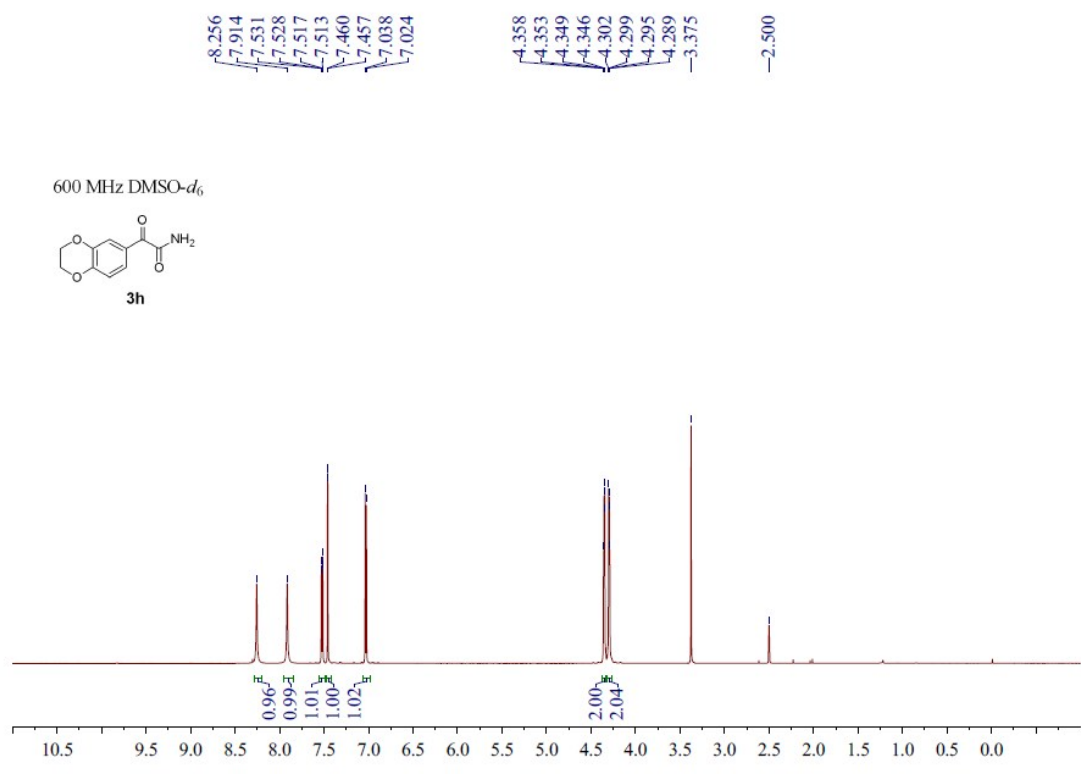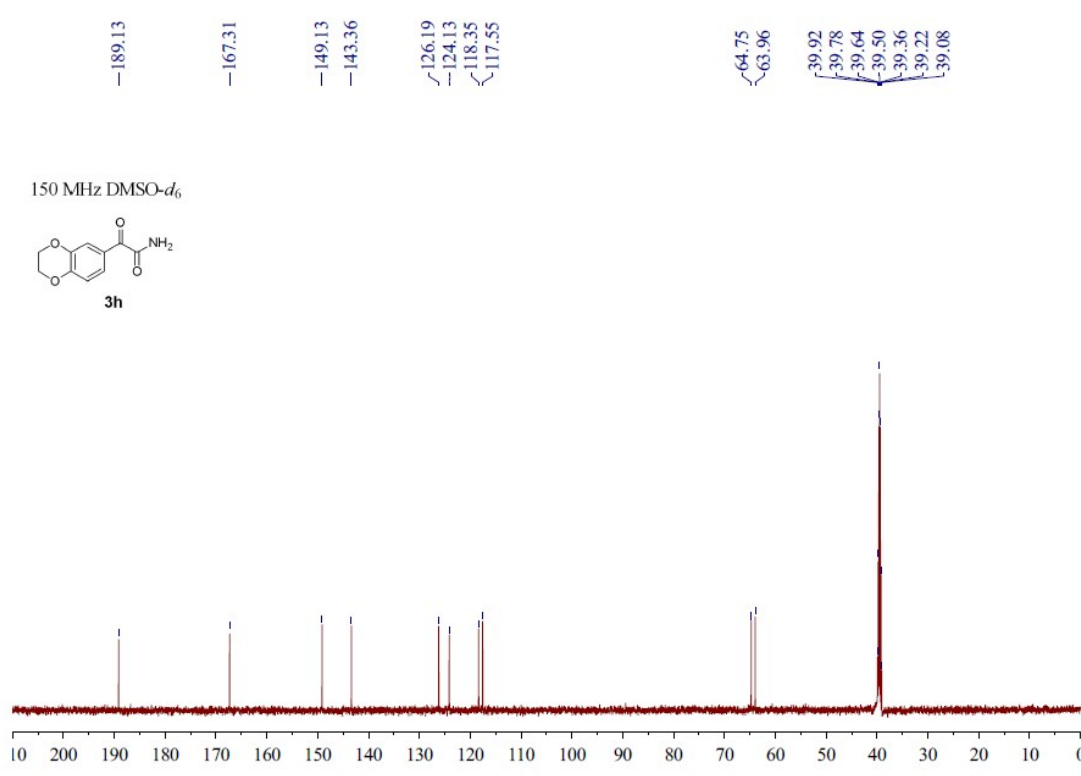

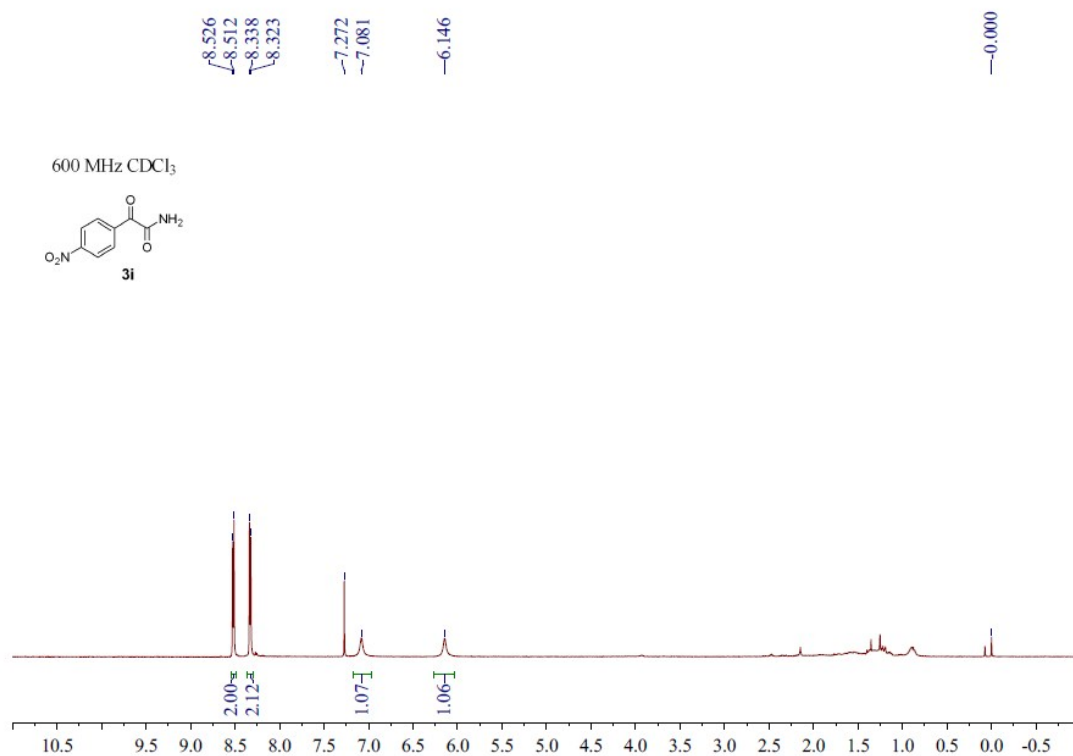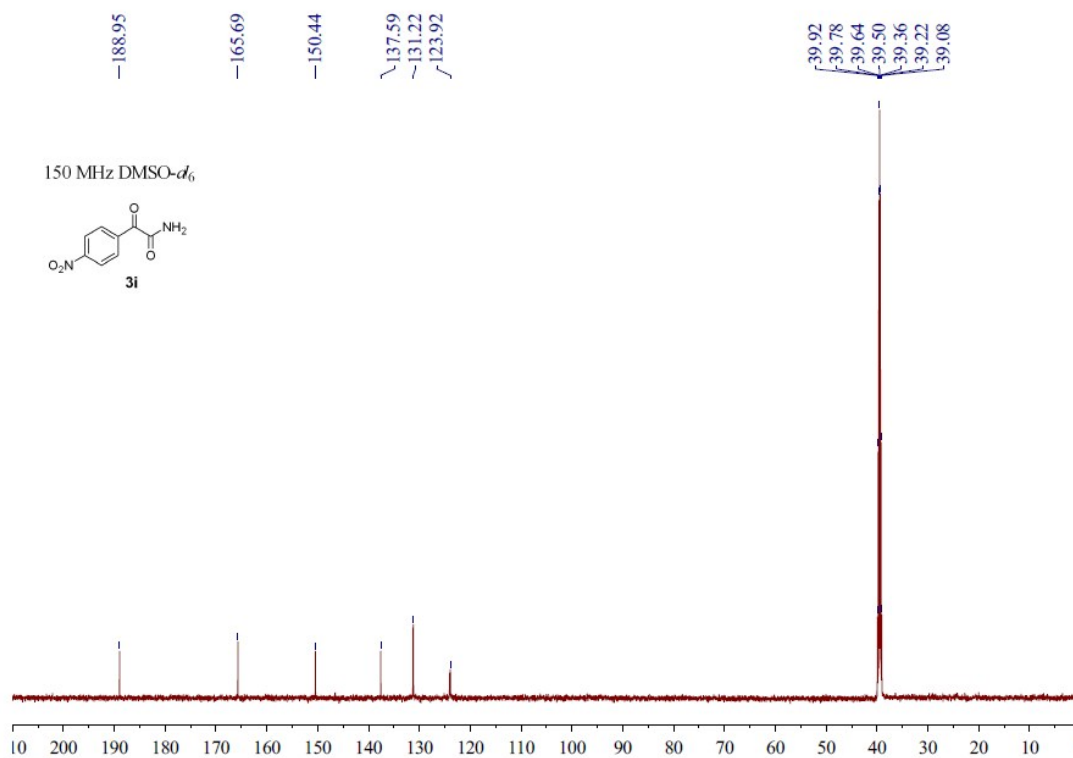

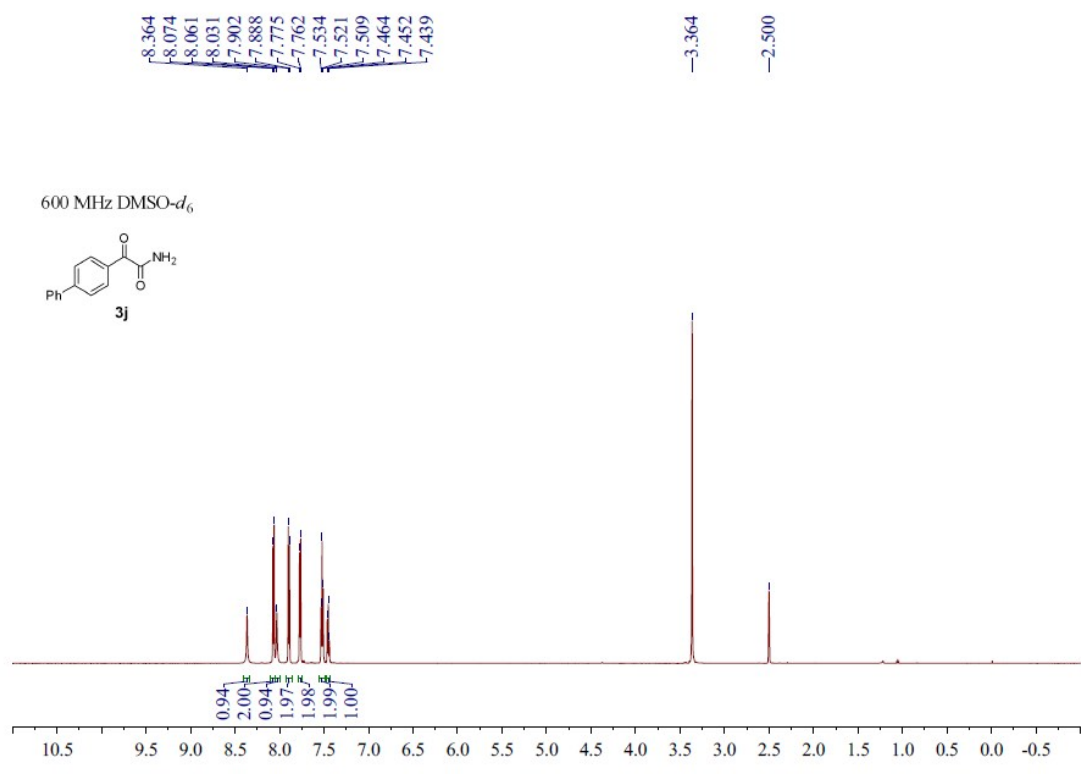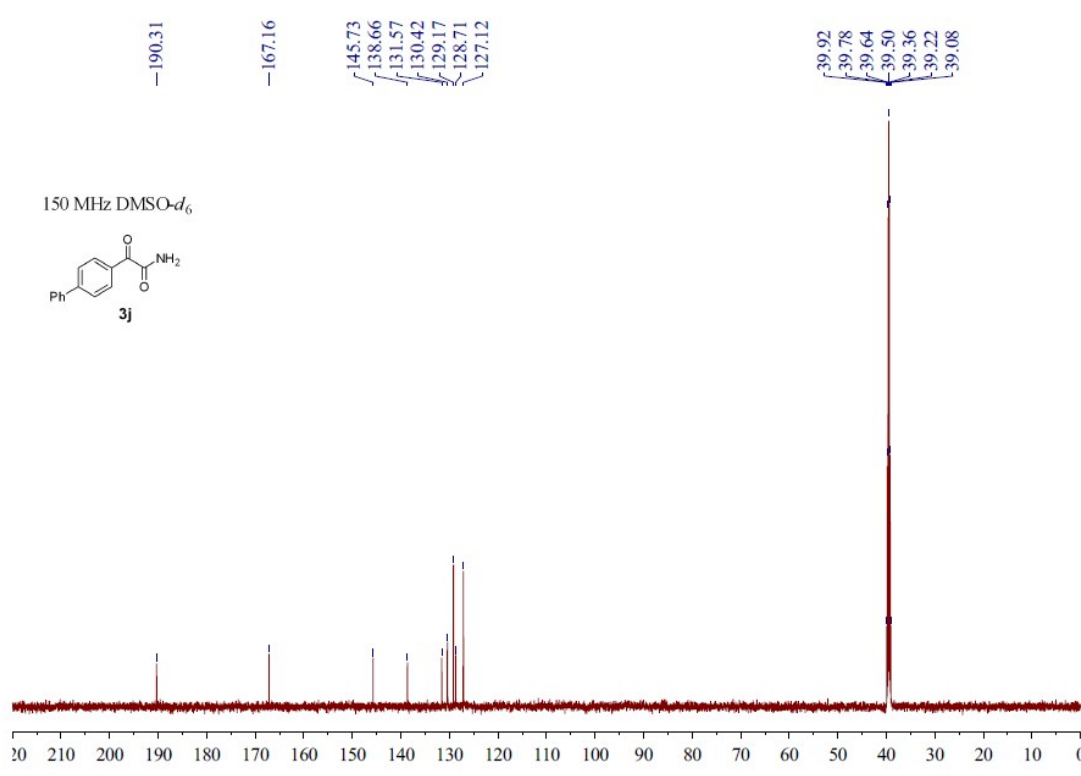

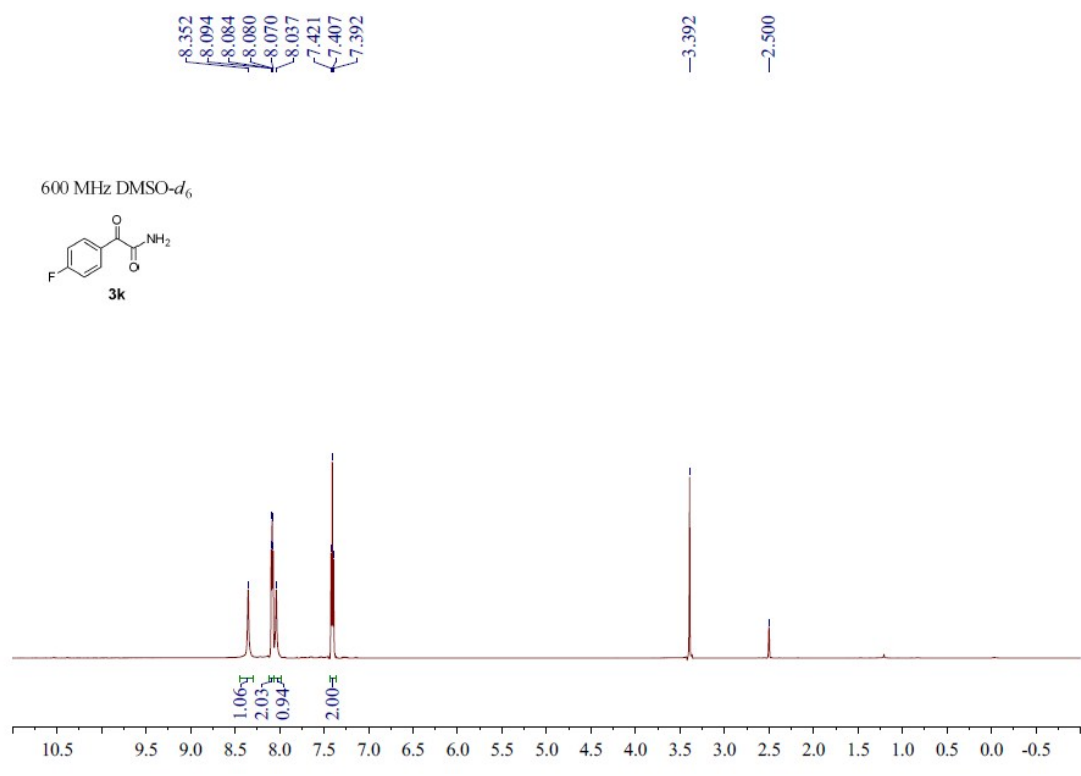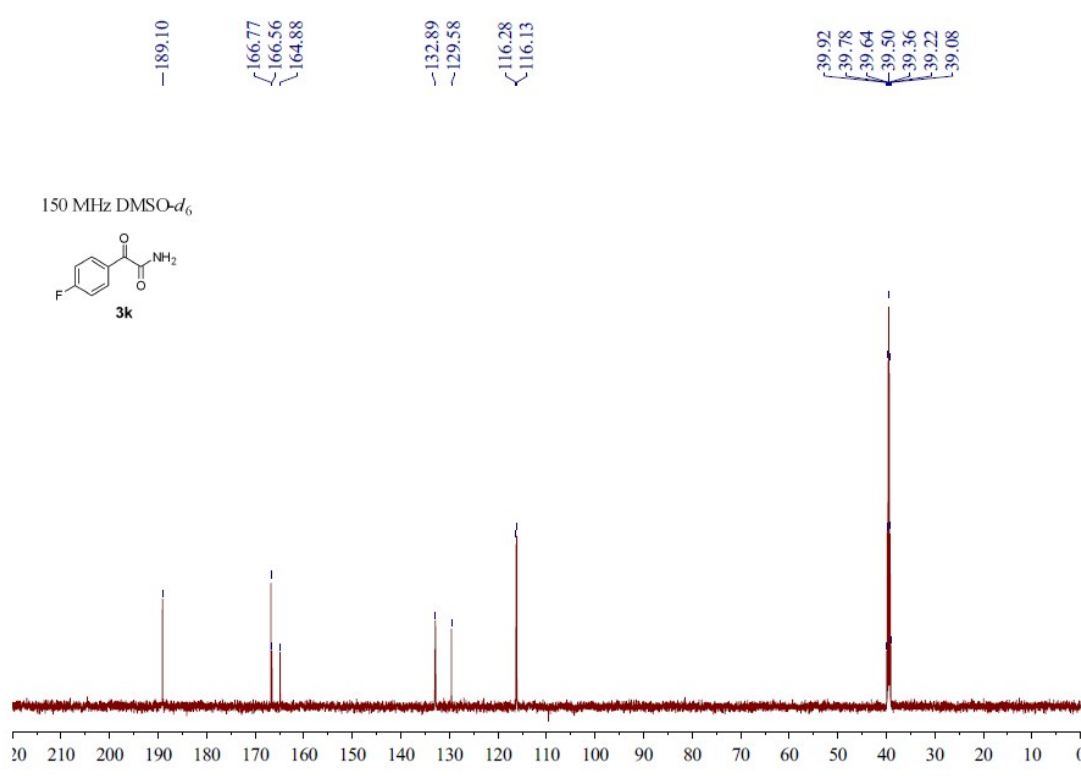

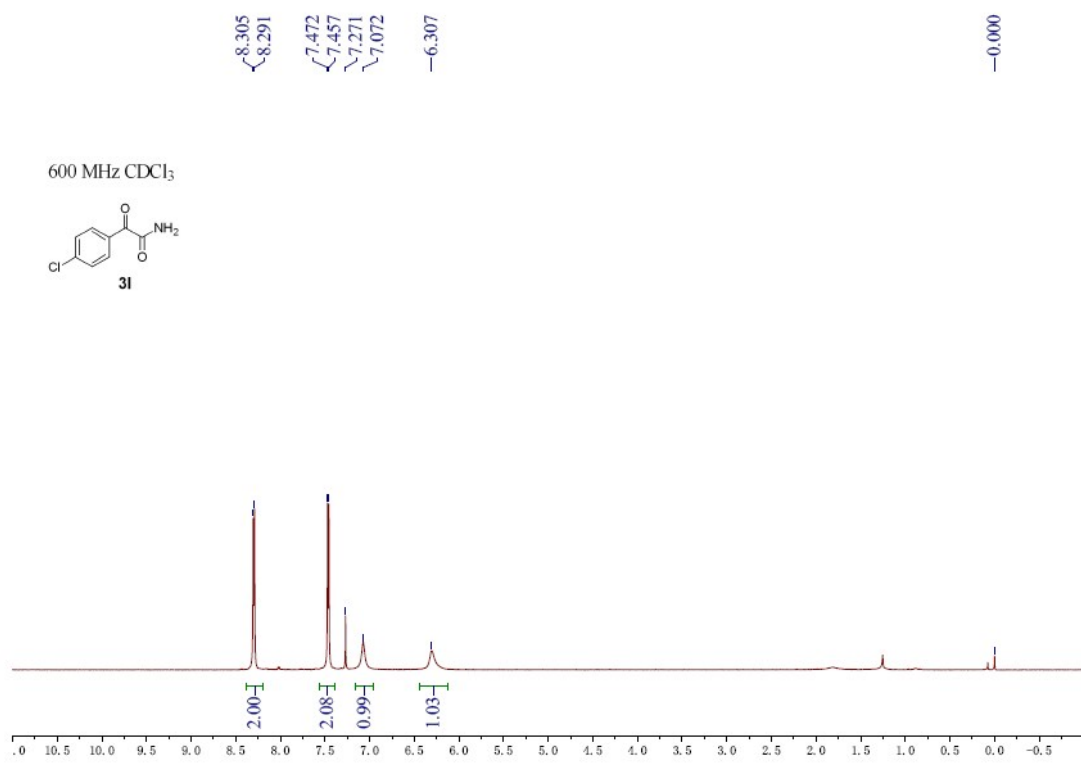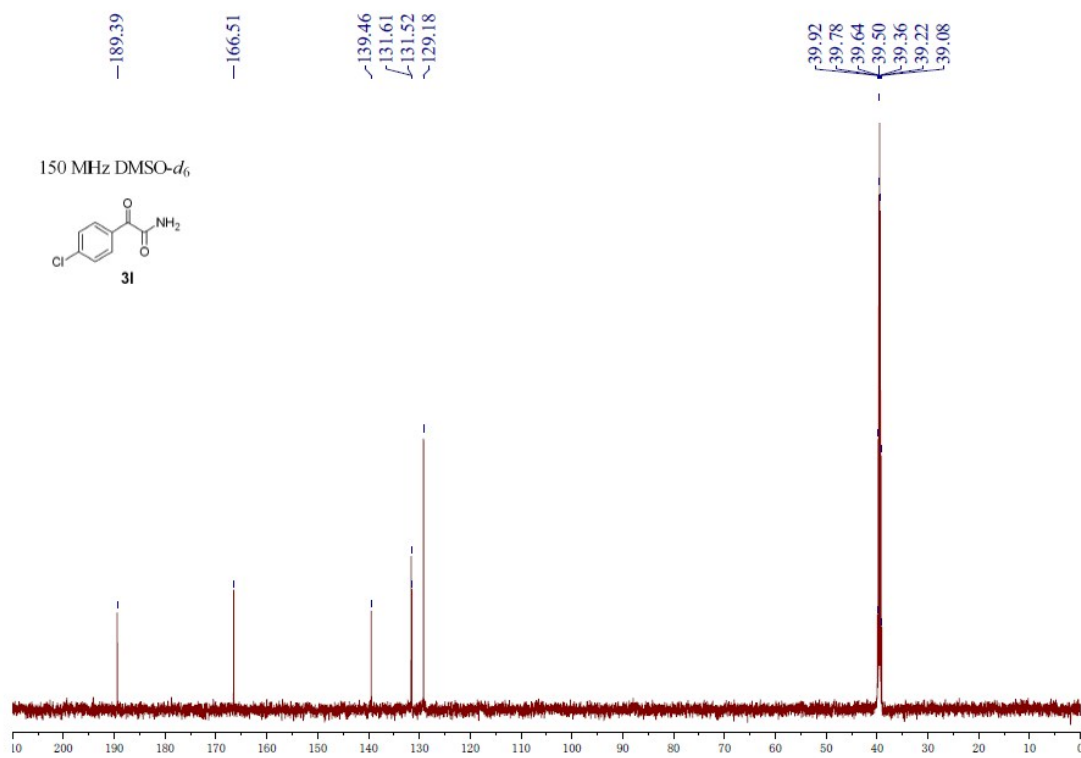

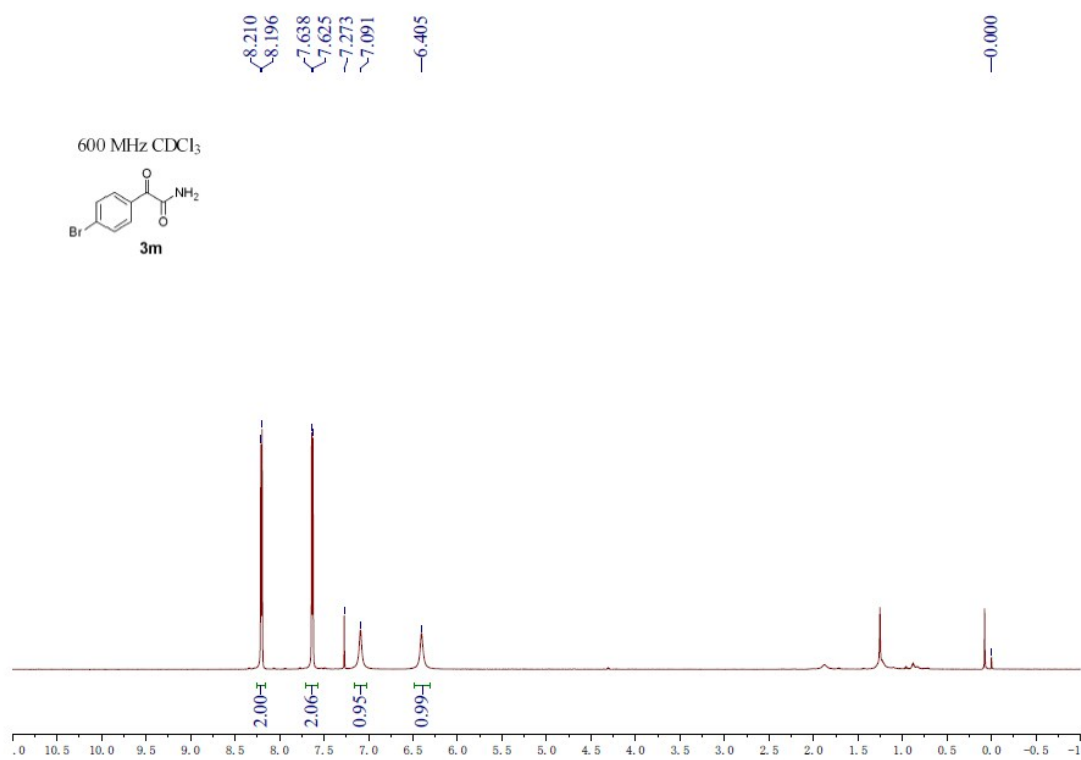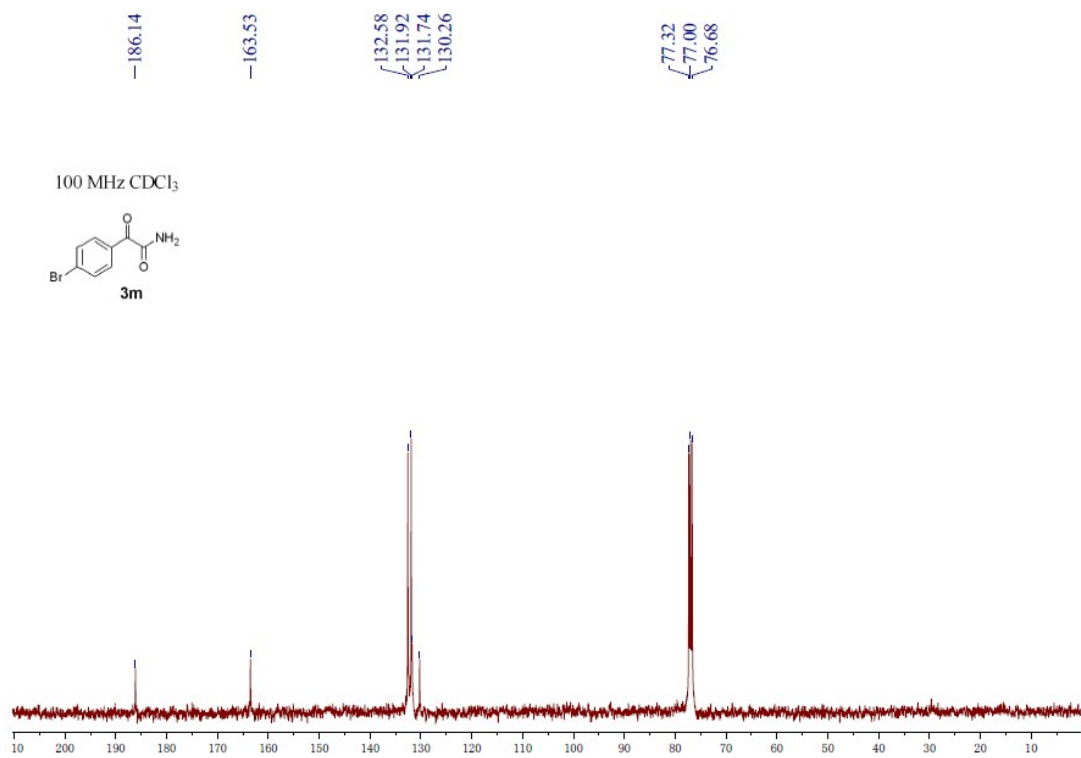

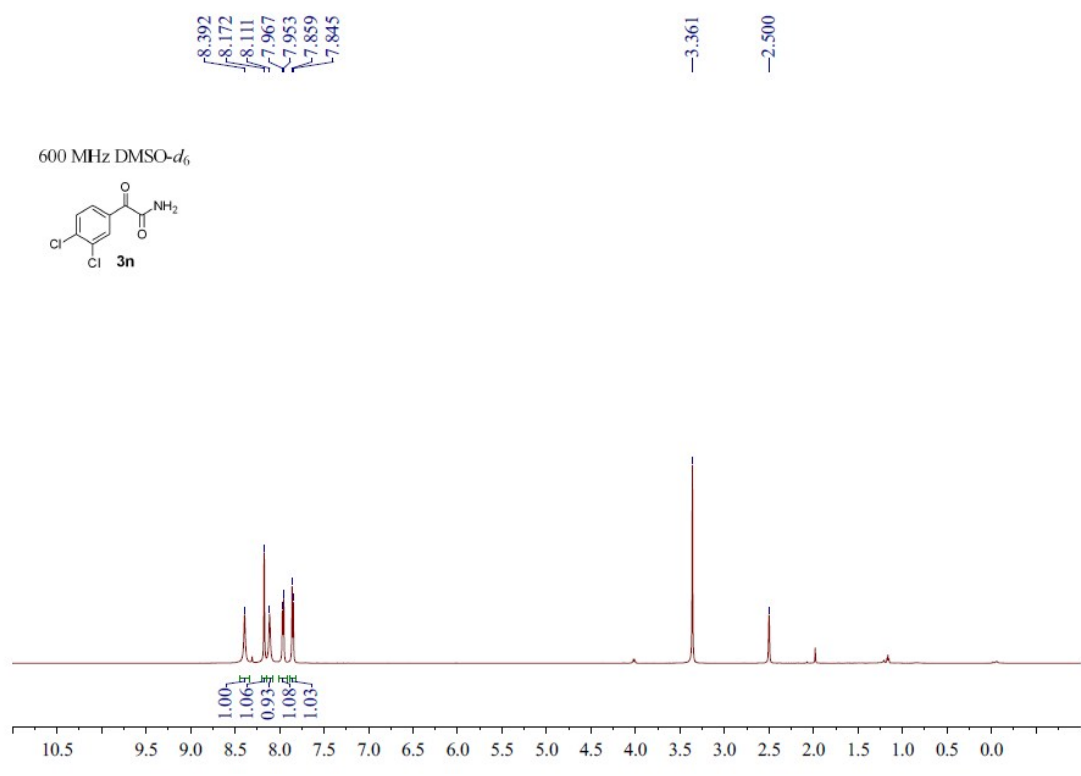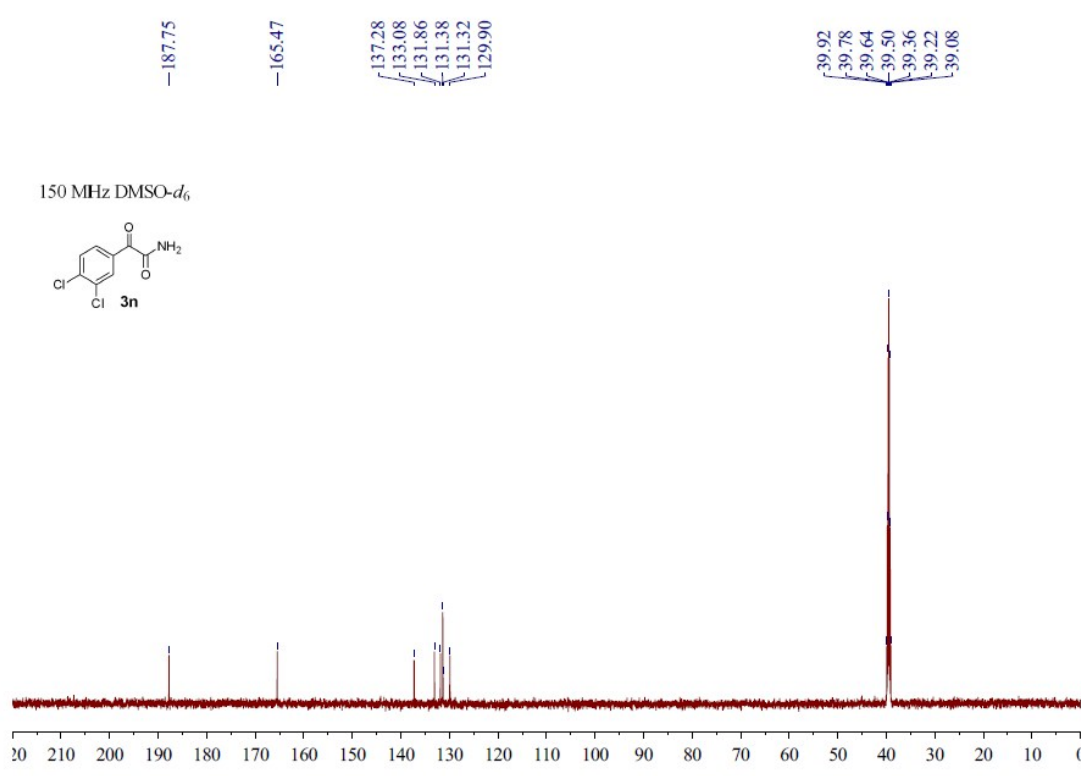



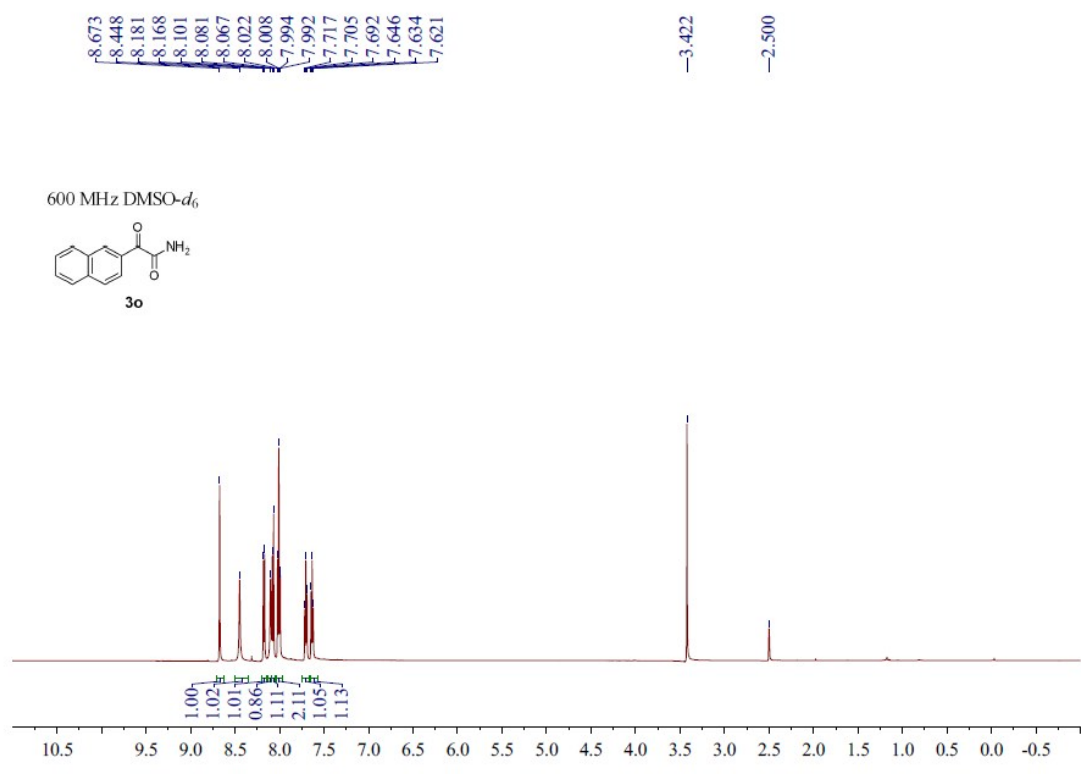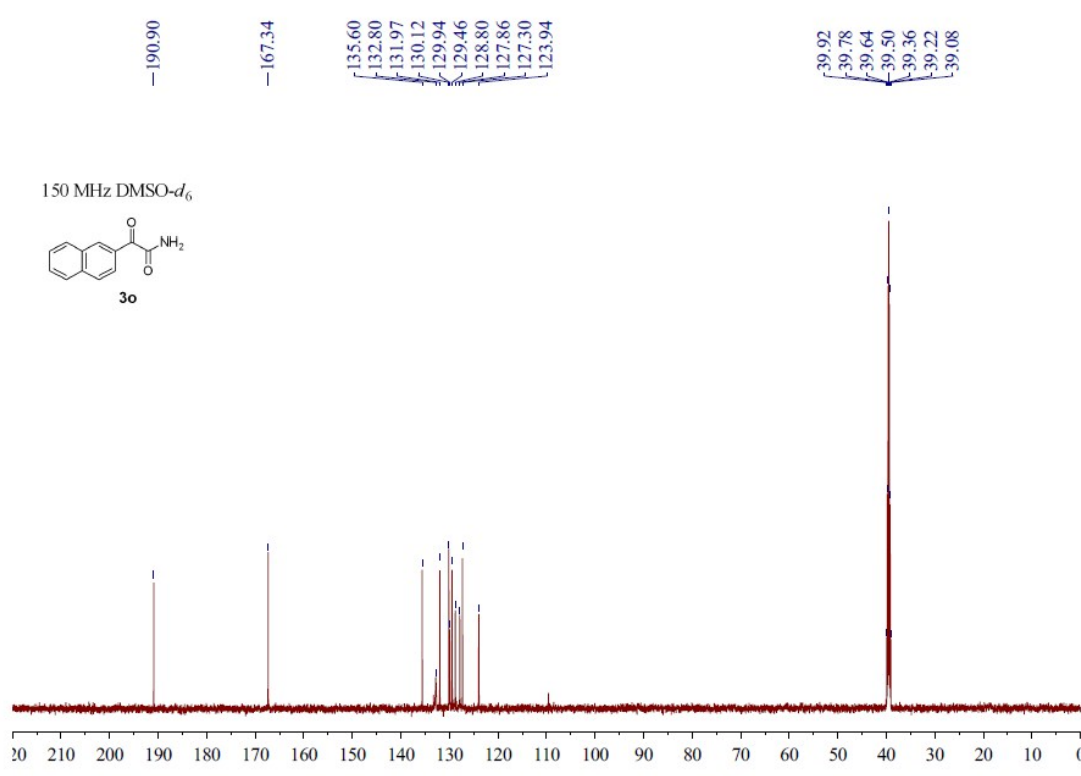

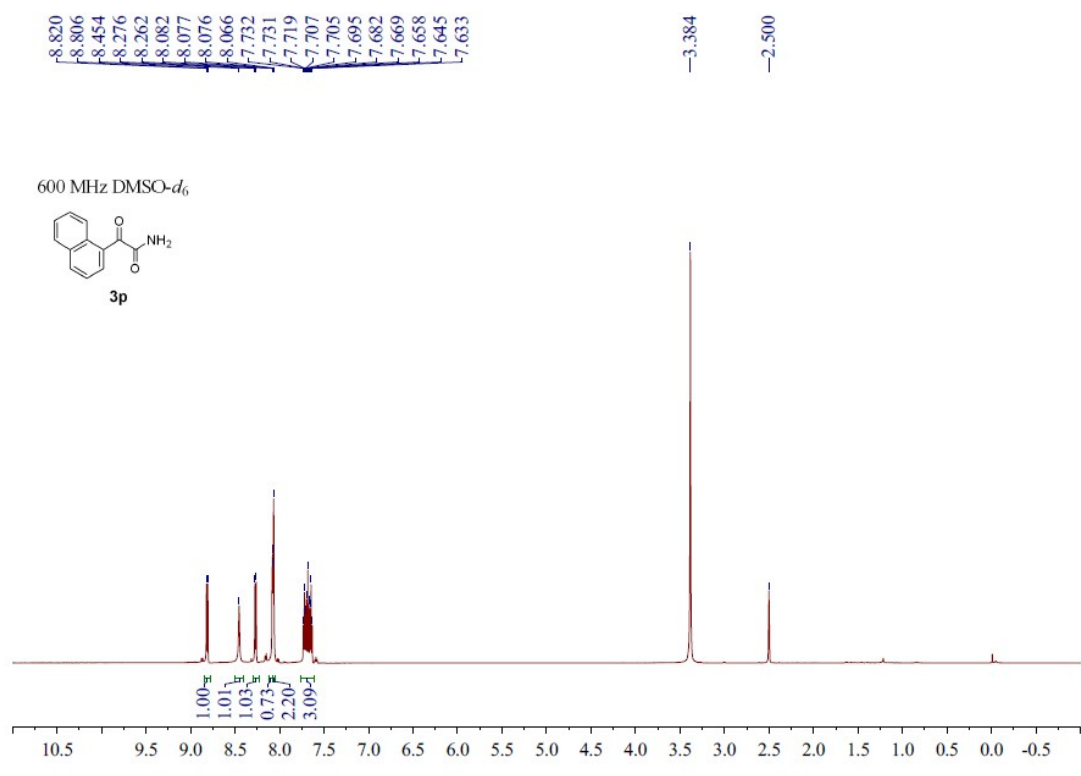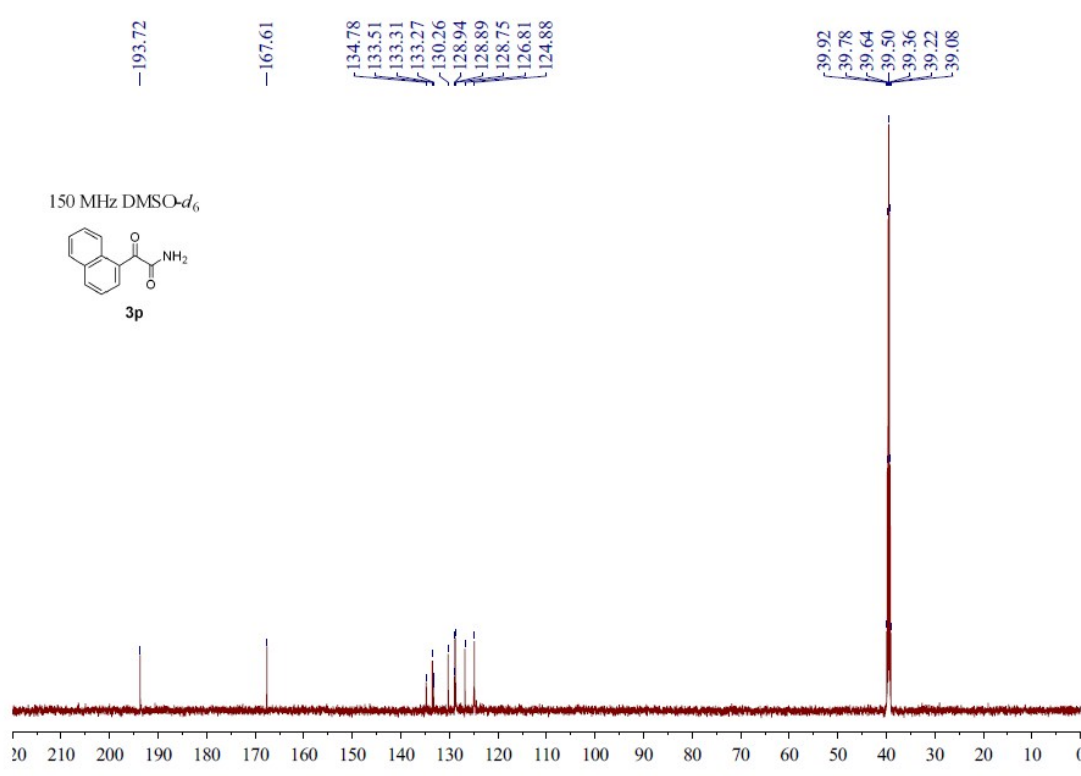

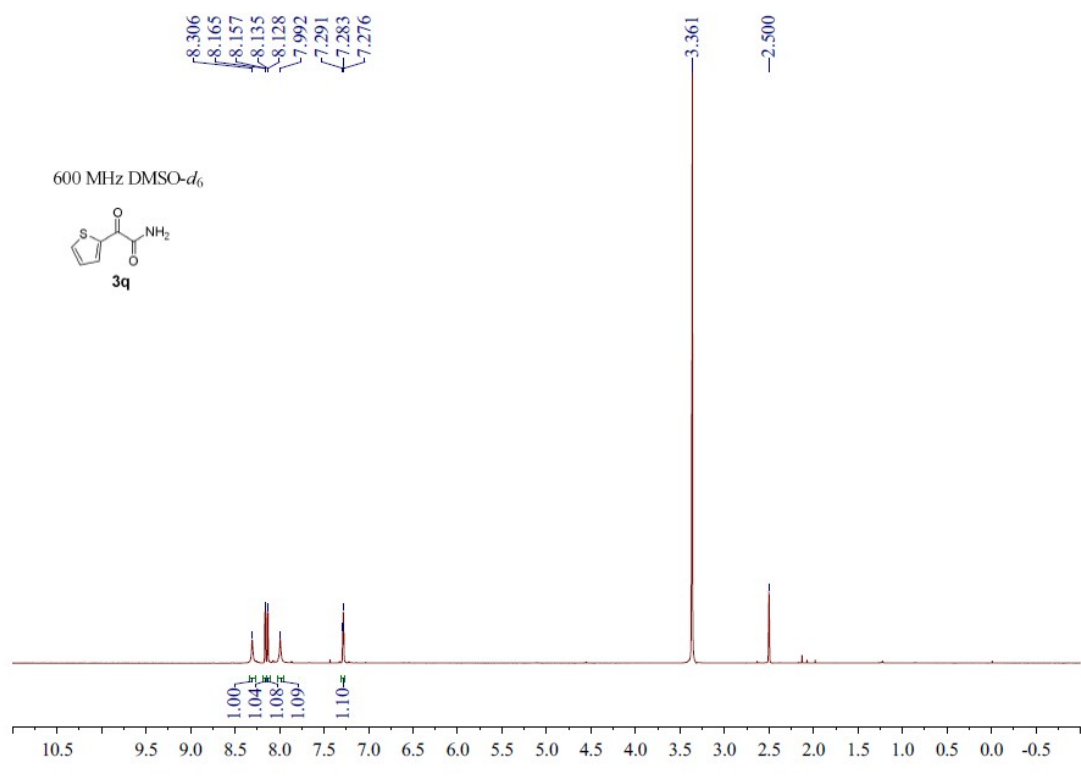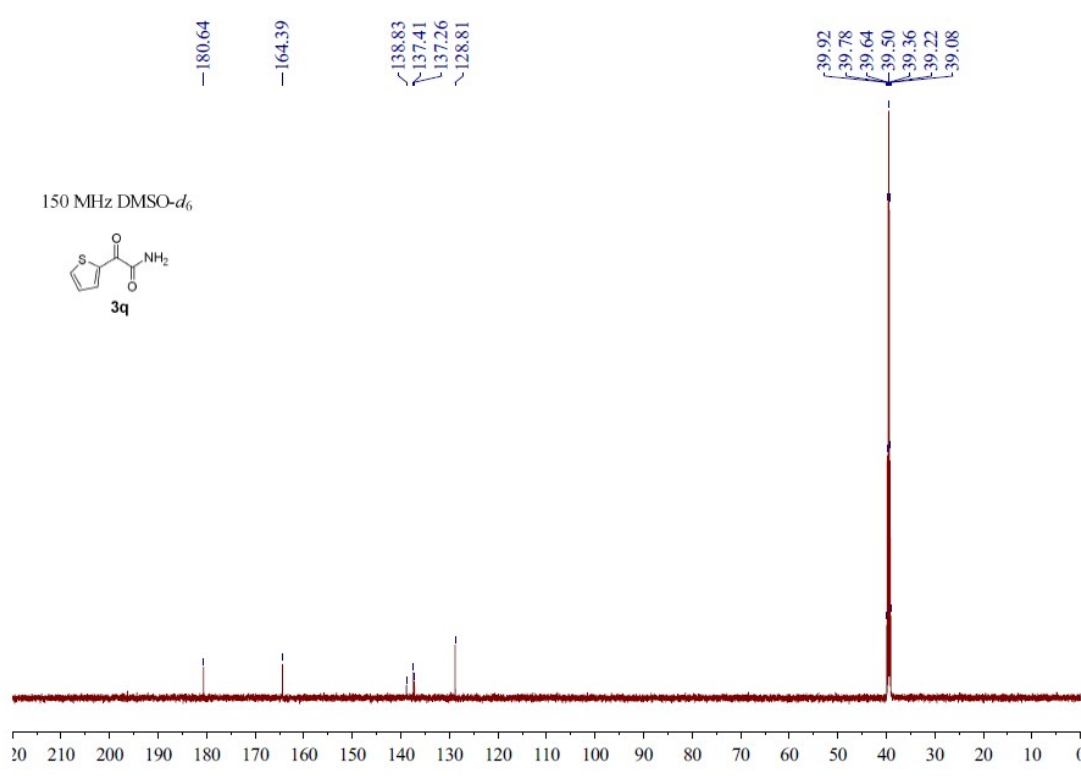

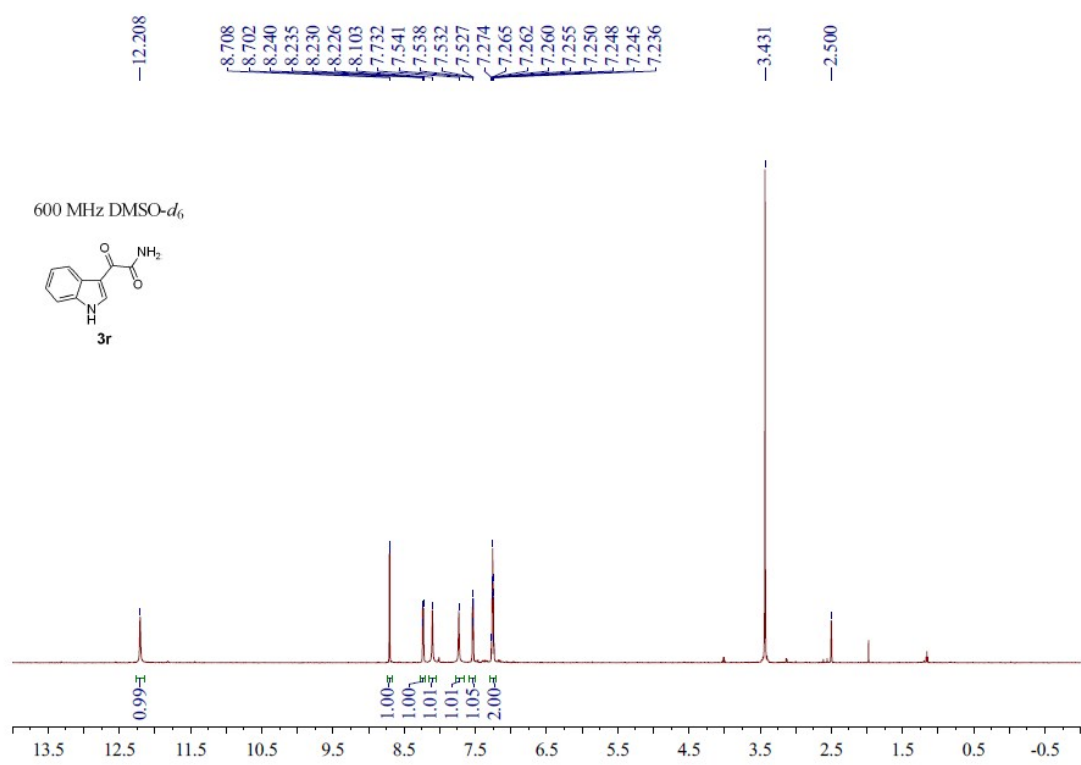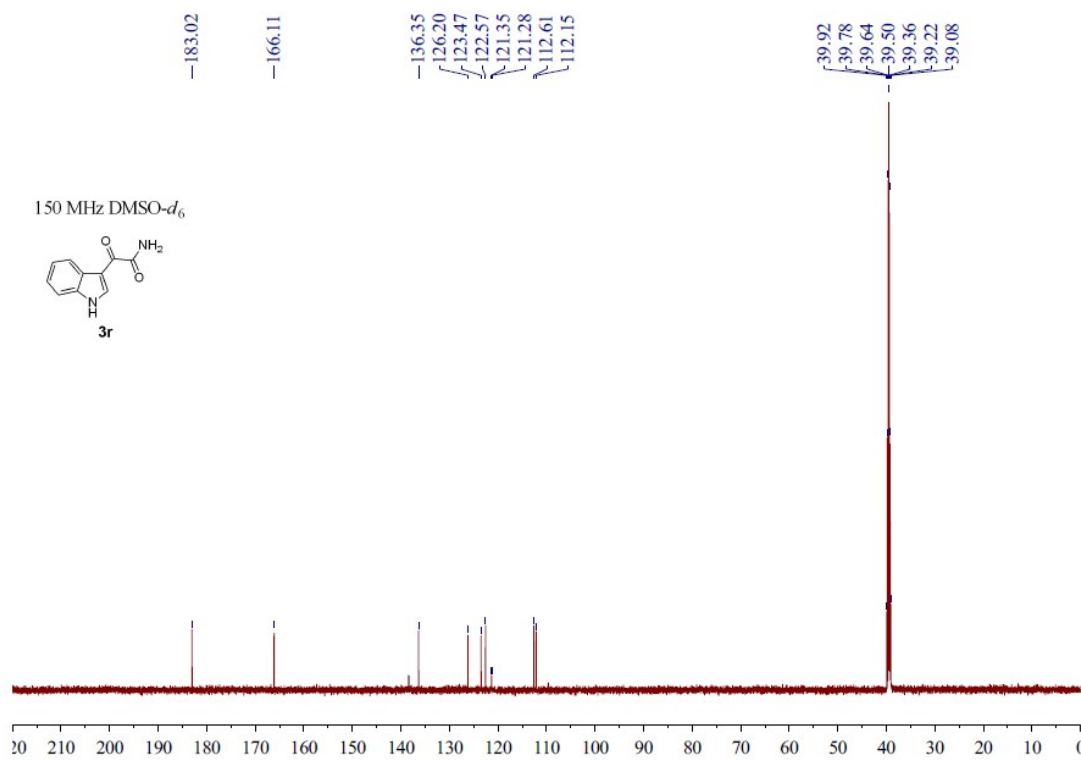

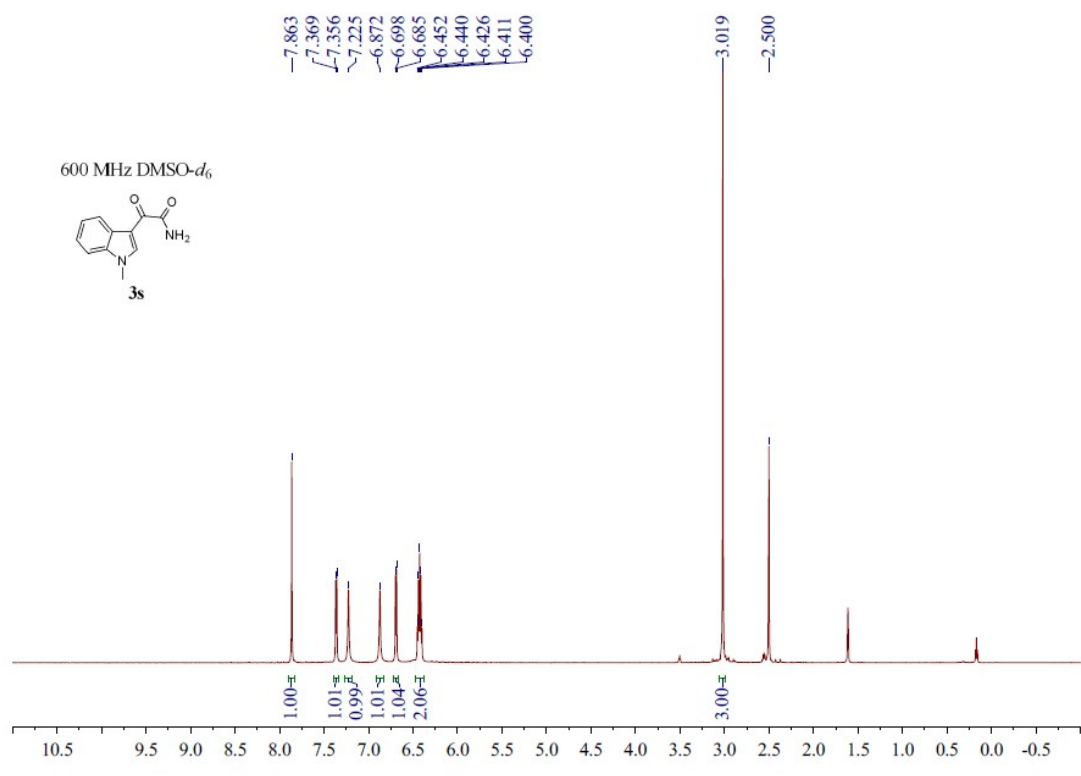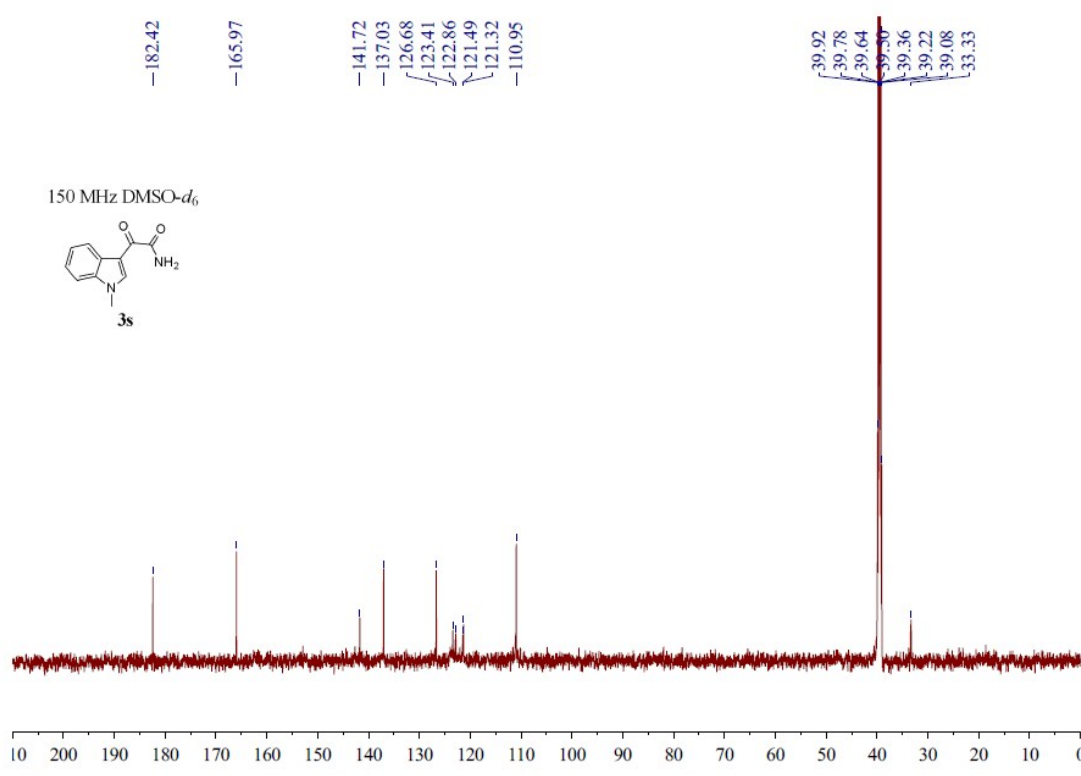

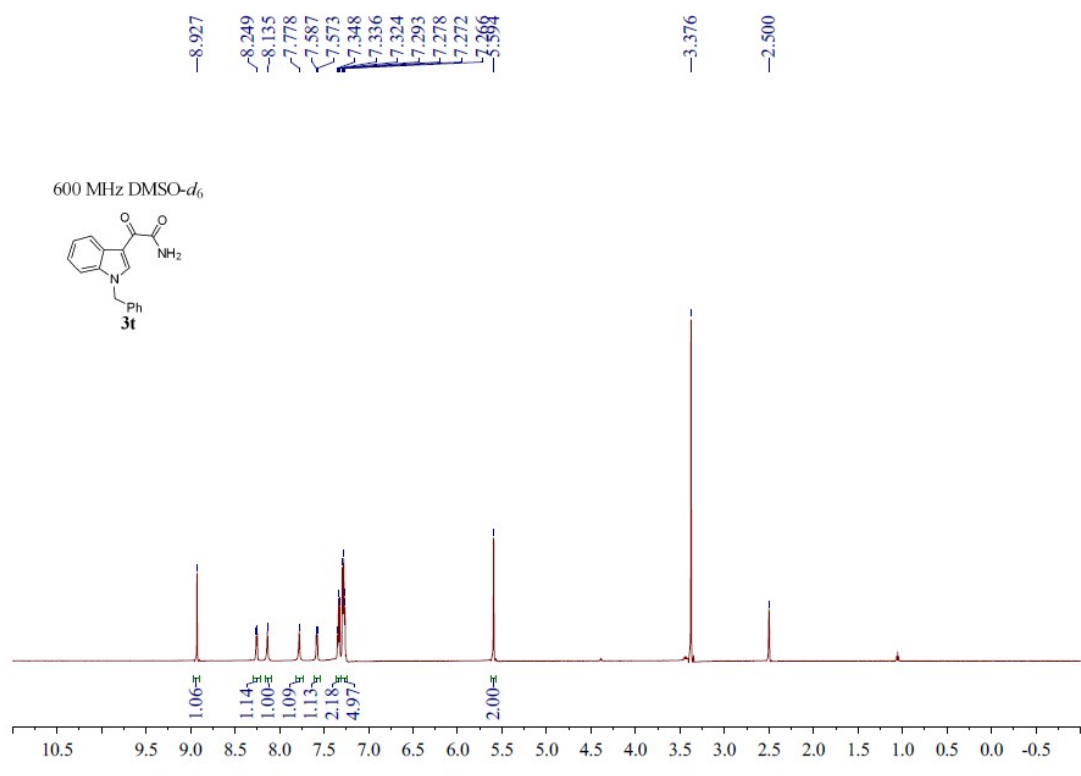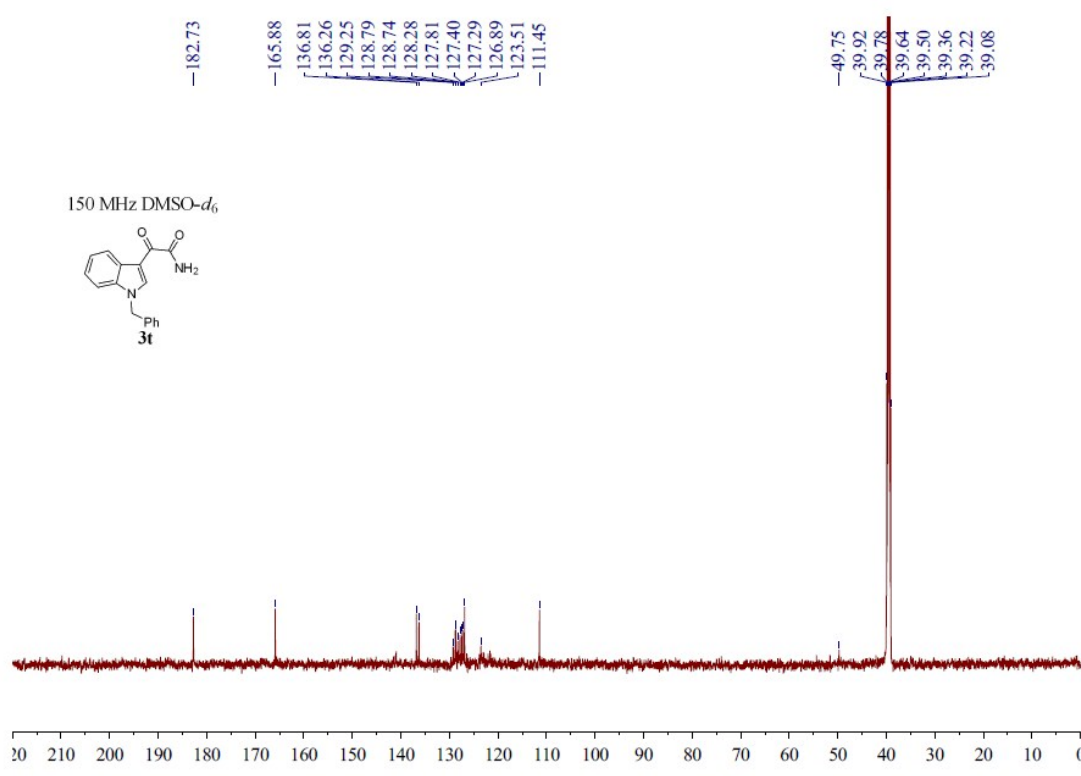

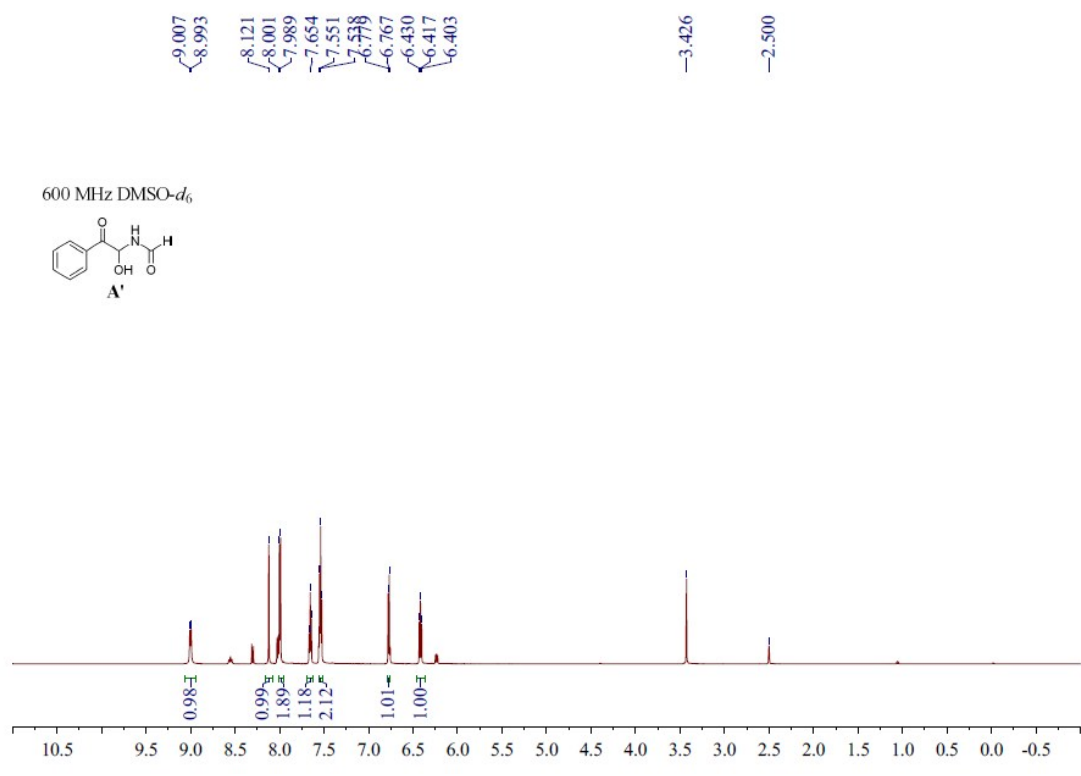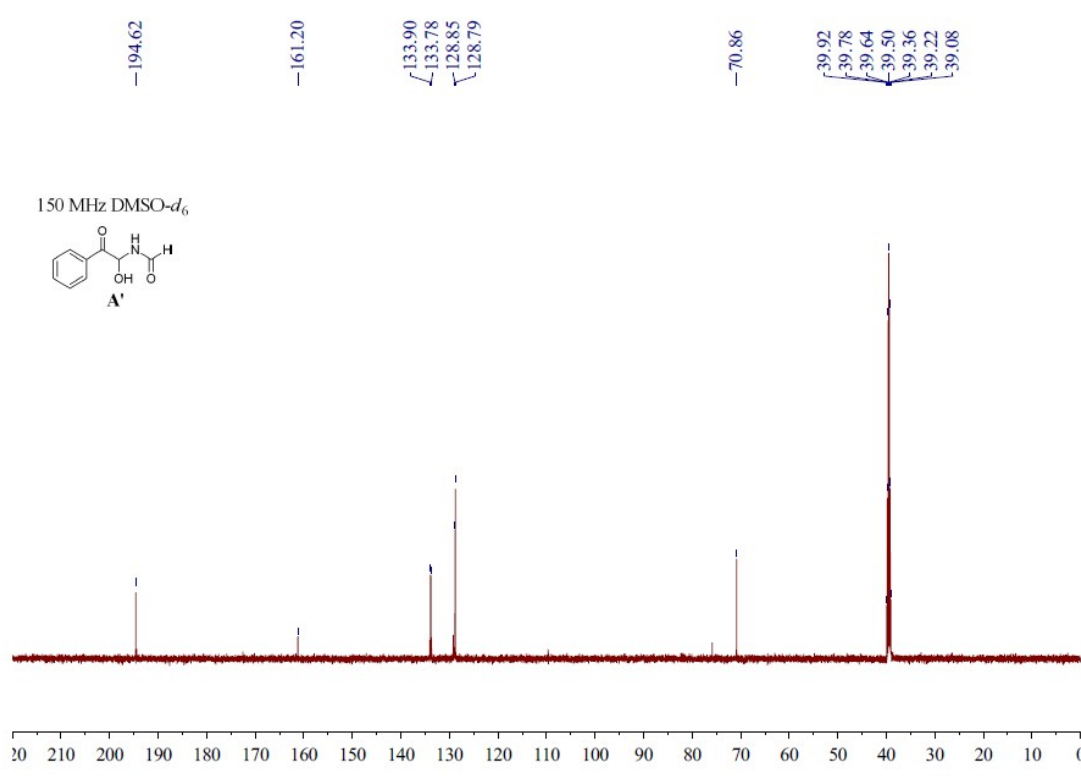

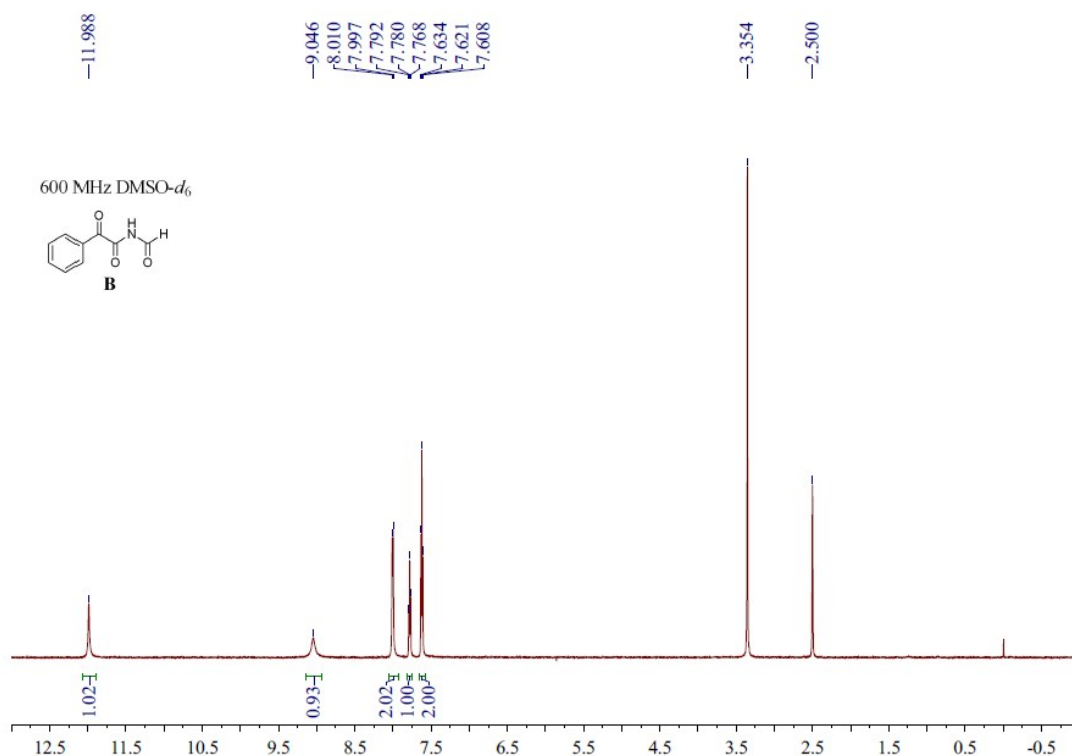

## Mass Spectrum SmartFormula Report

### Analysis Info

Analysis Name D:\Data\20141123\63136-B\_000002.d  
 Method 20140812  
 Sample Name  
 Comment

Acquisition Date 11/23/2014 11:16:39 AM

Operator  
 Instrument apex-Ultra

### Acquisition Parameter

|                          |            |                         |           |                       |                          |
|--------------------------|------------|-------------------------|-----------|-----------------------|--------------------------|
| Polarity                 | Positive   | Source                  | ESI       | No. of Laser Shots    | 20                       |
| Averaged Scans           | 2          | No. of Cell Fills       | 1         | Laser Power           | 51.0 %                   |
| Broadband Low Mass       | 100.3 m/z  | End Plate               | 3500.0 V  | MALDI Plate           | 300.0 V                  |
| Broadband High Mass      | 1200.0 m/z | Capillary Entrance      | 4000.0 V  | Imaging Spot Diameter | 2000.0 μm                |
| Acquisition Mode         | Single MS  | Skimmer 1               | 20.0 V    | Calibration Date      | Sat Nov 22 10:33:48 2014 |
| Pulse Program            | basic      | Drying Gas Temperature  | 180.0 °C  | Data Acquisition Size | 131072                   |
| Source Accumulation      | 0.0 sec    | Drying Gas Flow Rate    | 4.0 L/min | Apodization           | Sine-Bell Multiplication |
| Ion Accumulation Time    | 0.1 sec    | Nebulizer Gas Flow Rate | 1.0 L/min |                       |                          |
| Flight Time to Acq. Cell | 0.0 sec    |                         |           |                       |                          |

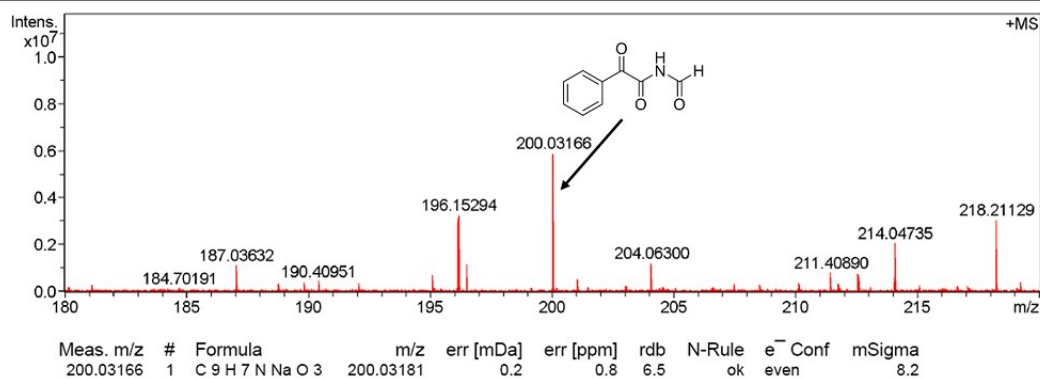



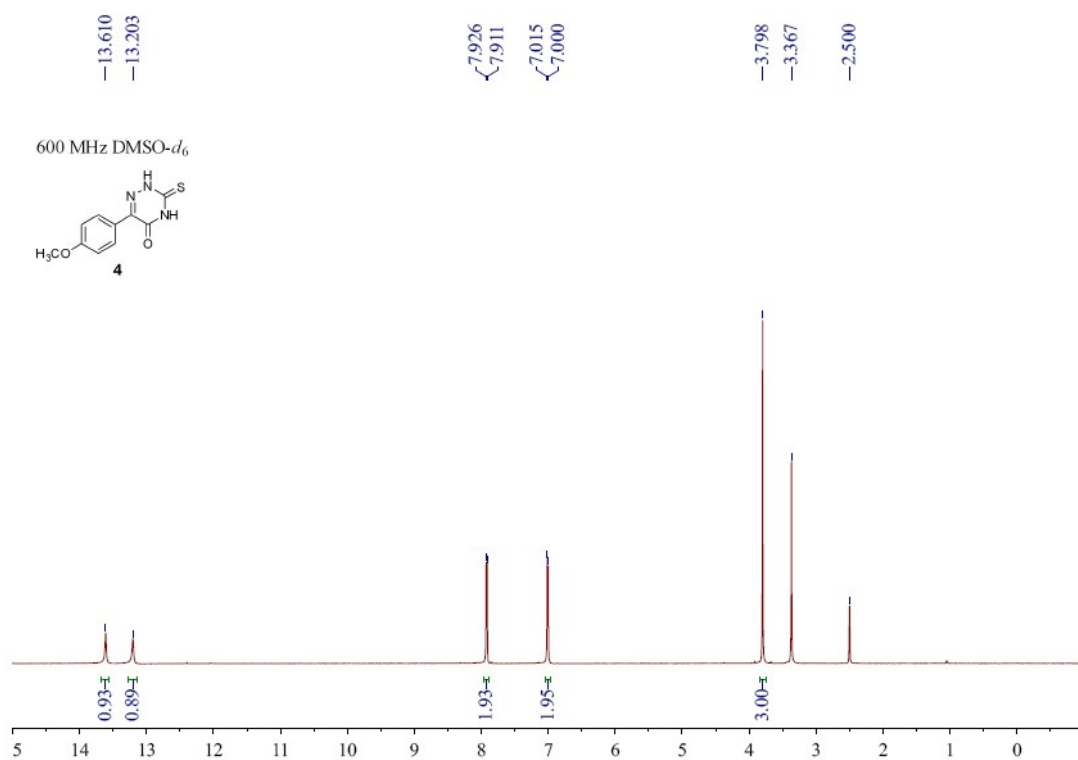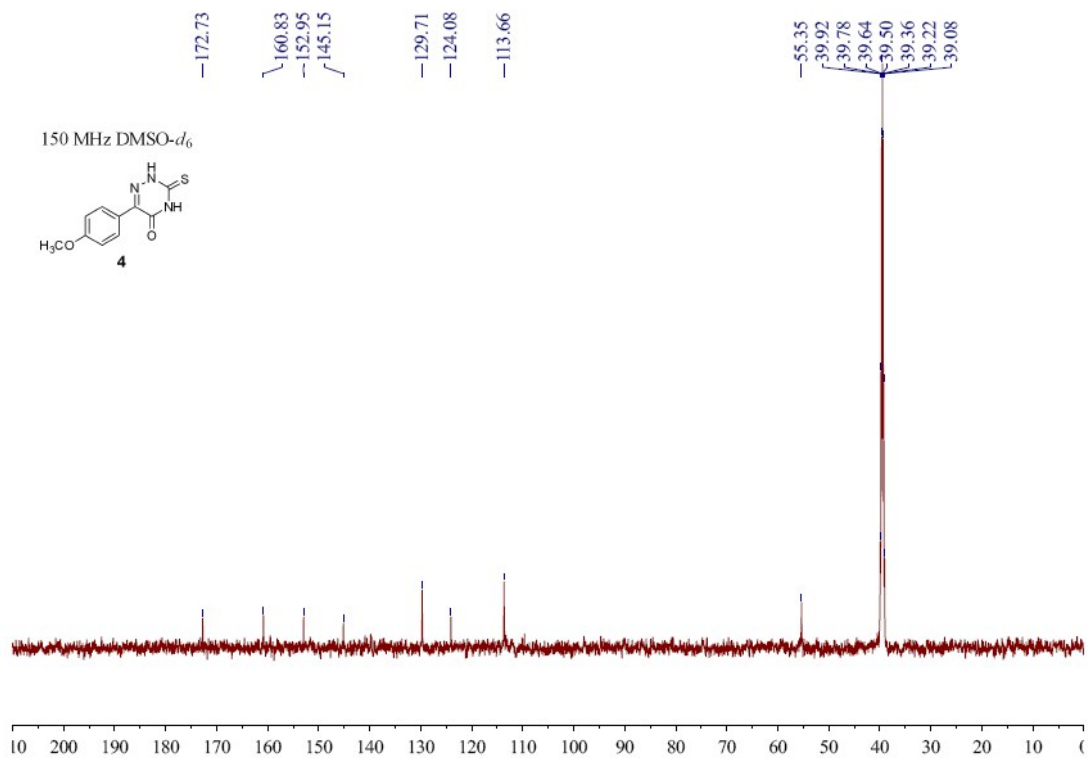

Supplement: c4ob02591a1.pdf [file c4ob02591a1.pdf]
